# Supplementary material for: Theoretical exploration of noncovalent interactions in Sc2C2@C2n (n = 40, 41, and 42)⊂[12]CPP, PF[12]CPP
Source: Royal Society of Chemistry journal article supplement (doi:10.1039/d2ra08153a), 2023-01-01
Supplement: d2ra08153a1.pdf [file d2ra08153a1.pdf]

## Supporting material

### Theoretical exploration of noncovalent interactions in $\text{Sc}_2\text{C}_2@C_{2n}$ ( $n = 40, 41, \text{ and } 42$ ) $\subset$ [12]CPP, PF[12]CPP

Yang Liu <sup>a</sup>, Wangchang Li <sup>a</sup>, Peiyong Li <sup>a</sup>, Yanmin Guo <sup>a</sup>, Peng Cui <sup>b,\*</sup>, Zhuxia Zhang<sup>c,\*</sup>

<sup>a</sup> College of Materials Science and Engineering, Key Laboratory of Interface Science and Engineering in Advanced Materials,

Taiyuan University of Technology, Taiyuan 030024, China

<sup>b</sup> The Novel Computer Architecture Laboratory, School of Information, Guizhou University of Finance and Economics, Guiyang

550025, China

<sup>c</sup> College of Chemistry, Taiyuan University of Technology, Taiyuan 030024, China

\*Corresponding author:

E-mail address: zhangzhuxia@tyut.edu.cn (Z. Zhang)

E-mail address: pcui@mail.gufe.edu.cn (P. Cui).

Table S1 Selected Interatomic Distances and Angles

| Molecules                                                  | Distance(Å) | Distance(Å) | Dihedral angle(°)     |
|------------------------------------------------------------|-------------|-------------|-----------------------|
|                                                            | C-C         | Sc-Sc       | Sc-C <sub>2</sub> -Sc |
| Sc <sub>2</sub> C <sub>2</sub> @C <sub>80</sub>            | 1.265       | 3.692       | 112.7                 |
| Sc <sub>2</sub> C <sub>2</sub> @C <sub>80</sub> ⊂[12]CPP   | 1.265       | 3.698       | 112.3                 |
| Sc <sub>2</sub> C <sub>2</sub> @C <sub>80</sub> ⊂PF[12]CPP | 1.265       | 3.677       | 111.8                 |
| Sc <sub>2</sub> C <sub>2</sub> @C <sub>82</sub>            | 1.266       | 3.939       | 126.0                 |
| Sc <sub>2</sub> C <sub>2</sub> @C <sub>82</sub> ⊂[12]CPP   | 1.266       | 3.937       | 125.6                 |
| Sc <sub>2</sub> C <sub>2</sub> @C <sub>82</sub> ⊂PF[12]CPP | 1.266       | 3.936       | 125.8                 |
| Sc <sub>2</sub> C <sub>2</sub> @C <sub>84</sub>            | 1.267       | 4.473       | 180.0                 |
| Sc <sub>2</sub> C <sub>2</sub> @C <sub>84</sub> ⊂[12]CPP   | 1.267       | 4.477       | 180.0                 |
| Sc <sub>2</sub> C <sub>2</sub> @C <sub>84</sub> ⊂PF[12]CPP | 1.267       | 4.476       | 180.0                 |

Table S2. Binding energies with and without ( $\Delta E_{cp}$  and  $\Delta E$ , kcal mol<sup>-1</sup>) BSSE (kcal mol<sup>-1</sup>) correction.  $\Delta E_{def}$  is the deformation energy of the monomers.

| Complexes                  | $\Delta E^a$ | BSSE <sup>a</sup> | $\Delta E_{cp}^a$ | $\Delta E_{def}$ |      |
|----------------------------|--------------|-------------------|-------------------|------------------|------|
|                            |              |                   |                   | Full             | Ring |
| C <sub>80</sub> ⊂[12]CPP   | -44.45       | 1.21              | -43.24            | 0.91             | 4.74 |
| C <sub>82</sub> ⊂[12]CPP   | -45.28       | 1.27              | -44.01            | 0.80             | 4.96 |
| C <sub>84</sub> ⊂[12]CPP   | -47.11       | 1.23              | -45.88            | 0.74             | 1.94 |
| C <sub>80</sub> ⊂PF[12]CPP | -56.06       | 4.93              | -51.13            | 0.71             | 1.85 |
| C <sub>82</sub> ⊂PF[12]CPP | -56.65       | 5.01              | -51.65            | 0.66             | 1.64 |
| C <sub>84</sub> ⊂PF[12]CPP | -57.27       | 5.26              | -52.01            | 0.58             | 1.23 |

<sup>a</sup> obtained at the  $\omega$ B97M-V/TZVPP level

**The coordinates for optimized compounds at the theory level of M06-2X-D3/6-31G\***

**The coordinates of optimized of [12]CPP**

|   |             |             |             |
|---|-------------|-------------|-------------|
| C | -8.96040800 | 0.69365500  | -0.37836500 |
| C | -8.96015300 | -0.69704100 | -0.37830400 |
| C | -8.16008700 | -1.41843600 | 0.51786100  |
| C | -7.46826000 | -0.69432800 | 1.49630200  |
| C | -7.46852000 | 0.69165300  | 1.49624500  |
| C | -7.81850300 | -2.85078900 | 0.32932300  |
| C | -7.63994100 | -3.35694800 | -0.96449900 |
| C | -6.94296500 | -4.53809200 | -1.17983400 |
| C | -6.38434400 | -5.24961200 | -0.11085800 |
| C | -6.70522200 | -4.83014500 | 1.18615900  |
| C | -7.41588100 | -3.65664600 | 1.40203900  |
| C | -5.29072700 | -6.22957500 | -0.32625300 |
| C | -4.36007400 | -5.96702000 | -1.33873100 |
| C | -3.15204800 | -6.64242600 | -1.39484200 |
| C | -2.81956800 | -7.61617800 | -0.44518300 |
| C | -3.79778200 | -7.96192700 | 0.49686700  |
| C | -5.00922300 | -7.28022100 | 0.55675500  |
| C | -1.40539700 | -8.05767800 | -0.35380400 |
| C | -0.57218800 | -8.05775300 | -1.47991900 |
| C | 0.80895100  | -8.06994800 | -1.34817200 |
| C | 1.41579900  | -8.11040500 | -0.08617300 |
| C | 0.58051800  | -8.29570600 | 1.02320100  |
| C | -0.80178400 | -8.25680200 | 0.89413600  |
| C | 2.83994000  | -7.71709000 | 0.06548400  |
| C | 3.77832400  | -7.85675800 | -0.96697800 |
| C | 4.98459300  | -7.16633800 | -0.93809900 |
| C | 5.30574500  | -6.32302400 | 0.13281900  |
| C | 4.43119600  | -6.29563900 | 1.22485100  |
| C | 3.22157700  | -6.97255200 | 1.18885600  |
| C | 6.37384600  | -5.29562900 | 0.06176700  |

|   |             |             |             |
|---|-------------|-------------|-------------|
| C | 6.52712000  | -4.55118100 | -1.11290600 |
| C | 7.22111600  | -3.34793700 | -1.10888200 |
| C | 7.79273200  | -2.84948200 | 0.06746400  |
| C | 7.77050800  | -3.67215400 | 1.20236400  |
| C | 7.07034600  | -4.87106300 | 1.20082200  |
| C | 7.79163400  | 2.85237600  | 0.06779400  |
| C | 7.21992400  | 3.35076300  | -1.10853500 |
| C | 6.52547200  | 4.55374400  | -1.11246300 |
| C | 6.37180700  | 5.29797600  | 0.06229400  |
| C | 7.06836900  | 4.87353000  | 1.20135600  |
| C | 7.76899900  | 3.67489000  | 1.20280000  |
| C | 5.30332200  | 6.32497200  | 0.13336700  |
| C | 4.98198200  | 7.16829600  | -0.93748400 |
| C | 3.77545800  | 7.85826300  | -0.96642400 |
| C | 2.83700200  | 7.71812500  | 0.06590900  |
| C | 3.21878700  | 6.97359300  | 1.18923800  |
| C | 4.42865200  | 6.29712500  | 1.22529200  |
| C | 1.41273000  | 8.11091300  | -0.08589600 |
| C | 0.80604900  | 8.07029100  | -1.34796900 |
| C | -0.57507000 | 8.05758300  | -1.47988600 |
| C | -1.40842100 | 8.05716100  | -0.35387500 |
| C | -0.80502900 | 8.25648200  | 0.89414200  |
| C | 0.57724200  | 8.29587300  | 1.02338100  |
| C | -2.82242600 | 7.61515900  | -0.44542000 |
| C | -3.15447400 | 6.64125600  | -1.39507700 |
| C | -4.36224800 | 5.96539000  | -1.33903800 |
| C | -5.29307900 | 6.22761800  | -0.32664100 |
| C | -5.01204200 | 7.27841300  | 0.55634300  |
| C | -3.80085700 | 7.96057300  | 0.49653100  |
| C | -6.38631600 | 5.24723300  | -0.11123100 |
| C | -6.94460400 | 4.53540100  | -1.18017400 |
| C | -7.64113400 | 3.35400600  | -0.96477000 |
| C | -7.41731800 | 3.65400300  | 1.40175100  |
| C | -6.70710800 | 4.82775800  | 1.18580500  |
| C | -7.81956700 | 2.84789000  | 0.32908600  |
| C | -8.16061300 | 1.41542400  | 0.51774200  |
| C | 7.81497600  | 0.69482800  | 1.29430200  |
| C | 8.16300300  | 1.41764200  | 0.14696500  |
| C | 8.63976800  | 0.69666300  | -0.95580500 |
| C | 8.64003100  | -0.69332100 | -0.95588800 |
| C | 8.16354800  | -1.41461300 | 0.14679800  |
| C | 7.81524900  | -0.69206600 | 1.29422200  |
| H | -9.55592100 | 1.22659000  | -1.11490900 |
| H | -9.55546700 | -1.23025900 | -1.11480500 |

|   |             |             |             |
|---|-------------|-------------|-------------|
| H | -6.82327500 | -1.21954400 | 2.19402500  |
| H | -6.82372700 | 1.21716200  | 2.19392400  |
| H | -7.95663300 | -2.76594000 | -1.81915200 |
| H | -6.76182700 | -4.87158000 | -2.19789000 |
| H | -6.30398800 | -5.37187500 | 2.03828800  |
| H | -7.59163900 | -3.32068300 | 2.42024900  |
| H | -4.53458700 | -5.14336000 | -2.02402100 |
| H | -2.41082500 | -6.32752600 | -2.12240300 |
| H | -3.59592500 | -8.75043200 | 1.21701700  |
| H | -5.73252900 | -7.54413100 | 1.32402100  |
| H | -1.00862300 | -7.97025400 | -2.47067600 |
| H | 1.42173000  | -7.94743600 | -2.23642500 |
| H | 1.01539000  | -8.39835600 | 2.01312800  |
| H | -1.41676900 | -8.28313800 | 1.78916800  |
| H | 3.54290700  | -8.47758700 | -1.82695800 |
| H | 5.67052300  | -7.24931200 | -1.77720500 |
| H | 4.64725200  | -5.63975600 | 2.06322400  |
| H | 2.51586600  | -6.82355700 | 1.99976200  |
| H | 5.99211600  | -4.85379300 | -2.00875600 |
| H | 7.21475100  | -2.73060200 | -2.00248800 |
| H | 8.26535000  | -3.34304900 | 2.11210500  |
| H | 7.02010300  | -5.46459000 | 2.10988100  |
| H | 7.21388200  | 2.73354500  | -2.00222400 |
| H | 5.99043800  | 4.85627400  | -2.00832300 |
| H | 7.01782500  | 5.46692200  | 2.11048600  |
| H | 8.26389200  | 3.34585500  | 2.11253900  |
| H | 5.66797400  | 7.25161800  | -1.77650500 |
| H | 3.53991100  | 8.47910100  | -1.82636200 |
| H | 2.51303500  | 6.82422200  | 2.00003600  |
| H | 4.64484900  | 5.64121200  | 2.06360500  |
| H | 1.41897700  | 7.94804500  | -2.23615500 |
| H | -1.01134200 | 7.96997600  | -2.47070500 |
| H | -1.42013000 | 8.28257800  | 1.78910100  |
| H | 1.01194800  | 8.39867000  | 2.01336500  |
| H | -2.41307600 | 6.32659200  | -2.12256000 |
| H | -4.53637400 | 5.14163200  | -2.02430700 |
| H | -5.73550700 | 7.54207800  | 1.32354300  |
| H | -3.59936300 | 8.74917900  | 1.21667100  |
| H | -6.76354900 | 4.86886600  | -2.19825000 |
| H | -7.95754700 | 2.76279900  | -1.81938900 |
| H | -7.59300300 | 3.31806800  | 2.41998200  |
| H | -6.30613000 | 5.36971500  | 2.03791000  |
| H | 7.42644500  | 1.22207500  | 2.16055700  |
| H | 8.97379500  | 1.23089900  | -1.84135900 |

|   |            |             |             |
|---|------------|-------------|-------------|
| H | 8.97426400 | -1.22732300 | -1.84150600 |
| H | 7.42692000 | -1.21956100 | 2.16041600  |

**The coordinates of optimized of PF[12]CPP**

|   |             |             |             |
|---|-------------|-------------|-------------|
| C | 0.70067000  | -8.66924200 | -0.71307100 |
| C | -0.69577600 | -8.66970800 | -0.71311500 |
| C | -1.41753700 | -7.48078900 | -0.74426400 |
| C | -0.68708400 | -6.29029500 | -0.73381200 |
| C | 0.69042000  | -6.28983800 | -0.73371500 |
| C | -2.89011200 | -7.33925100 | -0.73020200 |
| C | -3.69292800 | -7.80897600 | 0.30564700  |
| C | -4.97584100 | -7.30740800 | 0.50701400  |
| C | -5.49264500 | -6.29137900 | -0.29895600 |
| C | -4.72861900 | -5.91565700 | -1.40757800 |
| C | -3.47029900 | -6.44436700 | -1.62749700 |
| C | -6.56062500 | -5.36410500 | 0.13991200  |
| C | -6.44972400 | -4.78290300 | 1.40541500  |
| C | -7.07853100 | -3.58674100 | 1.70670900  |
| C | -7.80357400 | -2.88625200 | 0.74417300  |
| C | -8.03354700 | -3.53241200 | -0.46948400 |
| C | -7.44243300 | -4.75715400 | -0.75665600 |
| C | -7.97641600 | -1.42430200 | 0.88766600  |
| C | -6.82977100 | -0.69108700 | 1.20297600  |
| C | -6.83024400 | 0.68763100  | 1.20293800  |
| C | -7.97739200 | 1.42005800  | 0.88761200  |
| C | -9.12478800 | 0.69501800  | 0.57616500  |
| C | -9.12431500 | -0.70005300 | 0.57621300  |
| C | -7.80540600 | 2.88209900  | 0.74406200  |
| C | -7.08080800 | 3.58296200  | 1.70666500  |
| C | -6.45263800 | 4.77947600  | 1.40544900  |
| C | -6.56379000 | 5.36065400  | 0.13995800  |
| C | -7.44524900 | 4.75327500  | -0.75665500 |
| C | -8.03571900 | 3.52819600  | -0.46955200 |
| C | -5.49631000 | 6.28851200  | -0.29887600 |
| C | -4.98005100 | 7.30479100  | 0.50711400  |
| C | -3.69740700 | 7.80706200  | 0.30574300  |
| C | -2.89433400 | 7.33776000  | -0.73009100 |
| C | -3.47401300 | 6.44252300  | -1.62737400 |
| C | -4.73204600 | 5.91314400  | -1.40745900 |
| C | 2.88989700  | 7.33899000  | -0.73006000 |
| C | 3.69289600  | 7.80881600  | 0.30560300  |
| C | 4.97583300  | 7.30724300  | 0.50681900  |
| C | 5.49248900  | 6.29111000  | -0.29911200 |

|   |             |             |             |
|---|-------------|-------------|-------------|
| C | 4.72824800  | 5.91521500  | -1.40751900 |
| C | 3.46992300  | 6.44395000  | -1.62732400 |
| C | 6.56057700  | 5.36393500  | 0.13965700  |
| C | 6.45007000  | 4.78291300  | 1.40527100  |
| C | 7.07905200  | 3.58684600  | 1.70658800  |
| C | 7.80385200  | 2.88623000  | 0.74396000  |
| C | 8.03349000  | 3.53225500  | -0.46983000 |
| C | 7.44221300  | 4.75692100  | -0.75703200 |
| C | 7.97677900  | 1.42432200  | 0.88765300  |
| C | 6.83021900  | 0.69117400  | 1.20338200  |
| C | 6.83063100  | -0.68756100 | 1.20345400  |
| C | 7.97762100  | -1.42006500 | 0.88776600  |
| C | 9.12496400  | -0.69507200 | 0.57593600  |
| C | 9.12455700  | 0.69997700  | 0.57589100  |
| C | 7.80558600  | -2.88210400 | 0.74418500  |
| C | 7.08117200  | -3.58312300 | 1.70679400  |
| C | 6.45290900  | -4.77957800 | 1.40546800  |
| C | 6.56378300  | -5.36052200 | 0.13986700  |
| C | 7.44506700  | -4.75297400 | -0.75683400 |
| C | 8.03561200  | -3.52797600 | -0.46962600 |
| C | 5.49618200  | -6.28823500 | -0.29896600 |
| C | 4.97999900  | -7.30466300 | 0.50690500  |
| C | 3.69733100  | -7.80688700 | 0.30562200  |
| C | 3.47376300  | -6.44212000 | -1.62728600 |
| C | 4.73180700  | -5.91273700 | -1.40741300 |
| C | 2.89413000  | -7.33744600 | -0.73005900 |
| C | 1.42165600  | -7.47984500 | -0.74415400 |
| C | 0.68673500  | 6.29022400  | -0.73352800 |
| C | 1.41733900  | 7.48062900  | -0.74405900 |
| C | 0.69573700  | 8.66964800  | -0.71306300 |
| C | -0.70071400 | 8.66937200  | -0.71307800 |
| C | -1.42183400 | 7.48007000  | -0.74412100 |
| C | -0.69076200 | 6.28995400  | -0.73359300 |
| F | 1.34172900  | -9.83387400 | -0.70413200 |
| F | -1.33605800 | -9.83477000 | -0.70420800 |
| F | -1.31157400 | -5.11542200 | -0.69480500 |
| F | 1.31415300  | -5.11456500 | -0.69457100 |
| F | -3.19645700 | -8.67469700 | 1.18490800  |
| F | -5.67151600 | -7.74990700 | 1.54986600  |
| F | -5.13338100 | -4.93133900 | -2.20613400 |
| F | -2.76048200 | -5.97485200 | -2.65008200 |
| F | -5.61523600 | -5.29072200 | 2.30862200  |
| F | -6.85842100 | -3.04309800 | 2.90054700  |
| F | -8.73091200 | -2.91986600 | -1.42229900 |

|   |              |             |             |
|---|--------------|-------------|-------------|
| F | -7.64579100  | -5.29140900 | -1.95706200 |
| F | -5.67302100  | -1.30792700 | 1.43481300  |
| F | -5.67391800  | 1.30526600  | 1.43473400  |
| F | -10.24705800 | 1.33365000  | 0.25935300  |
| F | -10.24614300 | -1.33947600 | 0.25944100  |
| F | -6.86044100  | 3.03934900  | 2.90047300  |
| F | -5.61849400  | 5.28775900  | 2.30872300  |
| F | -7.64889500  | 5.28747000  | -1.95704000 |
| F | -8.73275300  | 2.91535600  | -1.42240900 |
| F | -5.67596000  | 7.74686200  | 1.54999800  |
| F | -3.20140200  | 8.67306300  | 1.18499700  |
| F | -2.76388800  | 5.97331900  | -2.64988100 |
| F | -5.13625800  | 4.92856000  | -2.20596800 |
| F | 3.19659800   | 8.67465700  | 1.18484900  |
| F | 5.67169900   | 7.74984800  | 1.54950400  |
| F | 5.13283300   | 4.93073300  | -2.20596600 |
| F | 2.75995300   | 5.97432700  | -2.64974700 |
| F | 5.61579200   | 5.29081400  | 2.30863600  |
| F | 6.85932900   | 3.04337800  | 2.90058200  |
| F | 8.73066200   | 2.91968400  | -1.42275800 |
| F | 7.64529500   | 5.29099000  | -1.95756700 |
| F | 5.67354100   | 1.30804500  | 1.43545300  |
| F | 5.67432400   | -1.30508500 | 1.43569500  |
| F | 10.24708800  | -1.33379300 | 0.25879900  |
| F | 10.24633200  | 1.33931300  | 0.25874500  |
| F | 6.86104400   | -3.03976000 | 2.90075800  |
| F | 5.61889700   | -5.28794400 | 2.30880700  |
| F | 7.64837600   | -5.28692200 | -1.95738500 |
| F | 8.73244100   | -2.91493100 | -1.42251200 |
| F | 5.67602500   | -7.74694800 | 1.54961400  |
| F | 3.20144700   | -8.67300100 | 1.18482800  |
| F | 2.76363300   | -5.97288900 | -2.64978500 |
| F | 5.13591400   | -4.92807500 | -2.20587600 |
| F | 1.31109500   | 5.11528500  | -0.69437300 |
| F | 1.33619600   | 9.83461100  | -0.70424100 |
| F | -1.34163900  | 9.83408100  | -0.70423100 |
| F | -1.31465400  | 5.11476500  | -0.69453800 |

**The coordinates of optimized of  $\text{Sc}_2\text{C}_2@C_{80}$**

|   |            |             |             |
|---|------------|-------------|-------------|
| C | 4.05270400 | 1.52397700  | -0.04842700 |
| C | 3.73376600 | 1.73847900  | 1.28686400  |
| C | 4.16196600 | 0.19301300  | -0.55560100 |
| C | 3.51548400 | 0.63088700  | 2.16694700  |
| C | 3.94877400 | -0.91551700 | 0.28368000  |

|   |             |             |             |
|---|-------------|-------------|-------------|
| C | 3.62118500  | -0.69786700 | 1.69786800  |
| C | 3.44144400  | 2.34332000  | -1.06788400 |
| C | 2.81857700  | 2.79313500  | 1.64909400  |
| C | 3.64831000  | 0.19420900  | -1.91939100 |
| C | 2.48941400  | 1.01739600  | 3.11019200  |
| C | 3.43965400  | -2.10208300 | -0.36292700 |
| C | 2.83888500  | -1.68052000 | 2.38718300  |
| C | 3.14496700  | 1.52251600  | -2.20355500 |
| C | 2.00257500  | 2.33146500  | 2.73092800  |
| C | 2.57742600  | 3.36397200  | -0.72139000 |
| C | 2.25512000  | 3.59247200  | 0.67121700  |
| C | 3.10675000  | -0.96045900 | -2.52855800 |
| C | 1.63700600  | 0.06277500  | 3.67046300  |
| C | 3.09312200  | -2.19833200 | -1.76269400 |
| C | 1.85622400  | -1.30179000 | 3.34290600  |
| C | 2.62429900  | -3.02085400 | 0.36130600  |
| C | 2.35575200  | -2.85361200 | 1.73088800  |
| C | 1.95957800  | 1.71611400  | -2.94945900 |
| C | 0.63406800  | 2.65132000  | 2.79009400  |
| C | 1.39554200  | 3.60366900  | -1.50444400 |
| C | 0.87613900  | 3.97894200  | 0.76032100  |
| C | 1.98937400  | -3.16093300 | -1.88187900 |
| C | 0.74255800  | -2.21795400 | 3.25597900  |
| C | 1.68449900  | -3.60587000 | -0.52772100 |
| C | 1.06888000  | -3.17874900 | 2.21849100  |
| C | 2.00227000  | -0.74845400 | -3.42716400 |
| C | 0.27005800  | 0.44404300  | 3.94231000  |
| C | 1.02276800  | 2.77717100  | -2.58103200 |
| C | 0.02243100  | 3.48655100  | 1.76734800  |
| C | 0.40634100  | 4.12523500  | -0.59617900 |
| C | 1.43958000  | 0.56257600  | -3.60513100 |
| C | -0.20630100 | 1.69478800  | 3.45705400  |
| C | 0.86243300  | -2.91645000 | -2.77265400 |
| C | 0.36806900  | -3.94282900 | -0.04167500 |
| C | 0.92376900  | -1.71153700 | -3.56828600 |
| C | 0.06318600  | -3.70739000 | 1.36413200  |
| C | -0.59624000 | -1.85724000 | 3.58958500  |
| C | -0.83968000 | -0.48292000 | 4.03805700  |
| C | 0.05301400  | 0.42459700  | -3.89653000 |
| C | -1.60481100 | 1.57346600  | 3.20938800  |
| C | -0.91470600 | 3.99509600  | -0.87867200 |
| C | -0.41200800 | 2.63378700  | -2.88350700 |
| C | -1.41357400 | 3.34342900  | 1.46336700  |
| C | -0.26980200 | -0.95913700 | -3.85677500 |

|    |             |             |             |
|----|-------------|-------------|-------------|
| C  | -2.03182000 | 0.24644100  | 3.59041300  |
| C  | -0.67231200 | -3.88107200 | -0.99361300 |
| C  | -1.28197800 | -3.40036800 | 1.72080500  |
| C  | -0.42632200 | -3.29349500 | -2.30904300 |
| C  | -1.60796600 | -2.46891700 | 2.78778000  |
| C  | -1.33608100 | 3.33745800  | -2.08831000 |
| C  | -1.85668400 | 3.70198400  | 0.17559000  |
| C  | -0.90034100 | 1.42857300  | -3.55039400 |
| C  | -2.23491100 | 2.37649300  | 2.18989100  |
| C  | -1.99590000 | -3.54789900 | -0.61463500 |
| C  | -2.29304900 | -3.30365700 | 0.73297100  |
| C  | -1.63043700 | -2.58402100 | -2.67214300 |
| C  | -2.80771100 | -1.76016200 | 2.37833400  |
| C  | -1.56617500 | -1.39558300 | -3.44501000 |
| C  | -3.03200400 | -0.39149200 | 2.74394700  |
| C  | -2.66805400 | 2.85026400  | -1.84183000 |
| C  | -2.98611600 | 3.07684100  | -0.45178200 |
| C  | -2.22651400 | 0.99261700  | -3.34392000 |
| C  | -3.37330700 | 1.81269600  | 1.58349200  |
| C  | -2.58933800 | -2.72754700 | -1.62935500 |
| C  | -3.20853300 | -2.26578900 | 1.09471500  |
| C  | -2.54658700 | -0.41473200 | -3.22591700 |
| C  | -3.70001800 | 0.40393400  | 1.78428800  |
| C  | -3.10798300 | 1.69889400  | -2.46552300 |
| C  | -3.74138200 | 2.14768700  | 0.24549300  |
| C  | -3.49979500 | -1.67477200 | -1.30553500 |
| C  | -3.82238400 | -1.43771300 | 0.10876200  |
| C  | -3.54025200 | -0.57883800 | -2.19840500 |
| C  | -4.16380900 | -0.12972100 | 0.52832500  |
| C  | -3.90345100 | 0.73295000  | -1.74317100 |
| C  | -4.21322100 | 0.95442300  | -0.41148300 |
| C  | -0.60536200 | 0.18727600  | -0.36398600 |
| C  | 0.52418400  | 0.55171200  | 0.07398200  |
| Sc | -0.80339100 | -0.32486600 | 1.81023800  |
| Sc | 1.13332700  | -1.20152500 | -1.20705600 |

**The coordinates of optimized of Sc<sub>2</sub>C<sub>2</sub>@C<sub>82</sub>**

|   |             |             |             |
|---|-------------|-------------|-------------|
| C | -0.92886800 | -2.74149400 | -2.95278600 |
| C | -2.09678000 | -2.84570100 | -2.16052500 |
| C | 0.34254100  | -3.27012300 | -2.50461200 |
| C | -0.66215800 | -1.57928500 | -3.75443100 |
| C | -3.02972000 | -1.76642100 | -2.22887200 |
| C | -2.01449800 | -3.56632000 | -0.90553500 |
| C | -3.80620900 | -1.36124500 | -1.07158900 |

|   |             |             |             |
|---|-------------|-------------|-------------|
| C | -2.76386100 | -0.60766700 | -3.01924600 |
| C | -0.69735000 | -3.90887600 | -0.43217900 |
| C | -2.83827800 | -3.20906200 | 0.25648400  |
| C | 0.51048500  | -3.77095100 | -1.20211400 |
| C | -0.67739700 | -3.78210600 | 0.98531800  |
| C | 1.77177300  | -3.56887000 | -0.49444800 |
| C | 1.36052200  | -2.47800500 | -3.11846100 |
| C | -3.72105100 | -2.04213600 | 0.19025200  |
| C | -1.96594200 | -3.33263800 | 1.41772400  |
| C | -3.76393400 | -1.18343900 | 1.33443700  |
| C | -3.99082000 | 0.06368000  | -1.17309300 |
| C | -2.98949900 | -1.41885500 | 2.53703000  |
| C | -3.96962600 | 0.24027800  | 1.24382200  |
| C | -2.04289400 | -2.47753700 | 2.57968600  |
| C | -0.87287000 | -2.29142300 | 3.34185700  |
| C | 0.38517400  | -2.87582700 | 2.93838600  |
| C | -0.59491200 | -1.02951700 | 3.96917600  |
| C | -2.72190700 | -0.16925400 | 3.15490400  |
| C | 2.81336400  | -2.94428100 | -1.21640800 |
| C | 2.57005900  | -2.31636800 | -2.49020700 |
| C | 3.82650900  | -2.16430500 | -0.56379200 |
| C | 1.78515300  | -3.46273200 | 0.96895600  |
| C | 0.53559300  | -3.55100700 | 1.71516700  |
| C | 2.83887500  | -2.74691000 | 1.57811900  |
| C | 1.41705700  | -2.01061400 | 3.41920900  |
| C | -4.05023200 | 0.88822900  | -0.01595900 |
| C | -3.33443100 | 0.85900300  | 2.36391500  |
| C | -3.53281700 | 2.21020600  | -0.11692200 |
| C | -3.36725500 | 0.51827300  | -2.37734500 |
| C | -2.87664000 | 2.82125400  | 0.99606200  |
| C | -2.89763800 | 2.65772400  | -1.31790500 |
| C | -2.72381900 | 2.13535600  | 2.23737900  |
| C | -1.53227500 | 2.38637200  | 2.97425400  |
| C | -0.91110400 | 1.35721000  | 3.75387600  |
| C | -0.50035700 | 3.22290500  | 2.44608100  |
| C | -1.84662400 | 3.67765100  | 0.48904500  |
| C | -1.48552800 | 0.05819800  | 3.83406900  |
| C | 0.82992200  | -0.82932800 | 3.97316300  |
| C | 0.50492100  | 1.53944300  | 3.70286900  |
| C | -2.76172100 | 1.80325700  | -2.44937000 |
| C | -1.85883800 | 3.57420300  | -0.95545000 |
| C | -1.58542300 | 1.94346900  | -3.23643500 |
| C | -0.54409200 | 2.84555200  | -2.85363100 |
| C | -0.97756700 | 0.81542700  | -3.87636700 |

|    |             |             |             |
|----|-------------|-------------|-------------|
| C  | -0.66047200 | 3.71443400  | -1.72715900 |
| C  | 0.54849100  | 4.08919500  | -1.03018000 |
| C  | 0.56169400  | 4.19857500  | 0.44647500  |
| C  | 1.77572900  | 3.42159500  | -1.42360500 |
| C  | 0.71430300  | 2.24503500  | -3.24811600 |
| C  | -0.63547000 | 3.92828100  | 1.21216500  |
| C  | 0.76740900  | 2.67858300  | 2.89550500  |
| C  | 1.79699700  | 3.58952300  | 0.90647600  |
| C  | -1.54905300 | -0.48068300 | -3.75704800 |
| C  | 0.43934400  | 1.00146700  | -3.87963500 |
| C  | 0.76092800  | -1.38401500 | -3.81775000 |
| C  | 1.34045700  | -0.09338000 | -3.76634400 |
| C  | 2.60524500  | 0.10467800  | -3.05831100 |
| C  | 3.24665800  | -1.04626300 | -2.54064500 |
| C  | 3.77342400  | 1.41376600  | -1.30942900 |
| C  | 2.88093200  | 1.38847700  | -2.41165900 |
| C  | 4.35612600  | 0.21593900  | -0.77871400 |
| C  | 3.56468600  | 2.28858200  | -0.19001500 |
| C  | 1.88104100  | 2.45123400  | -2.48532800 |
| C  | 4.08692900  | -0.98905700 | -1.37998800 |
| C  | 2.56548200  | 3.24134500  | -0.24720700 |
| C  | 4.36918200  | 0.31887600  | 0.67208600  |
| C  | 4.11134200  | -0.78895900 | 1.44193100  |
| C  | 3.79375500  | 1.57933700  | 1.03879000  |
| C  | 3.29102700  | -0.68088000 | 2.61223700  |
| C  | 3.83792700  | -2.06710500 | 0.80390200  |
| C  | 2.91993700  | 1.71098700  | 2.14745900  |
| C  | 1.92005200  | 2.77561500  | 2.09091200  |
| C  | 2.65551700  | 0.53149100  | 2.97270200  |
| C  | 2.61498000  | -1.94479600 | 2.75487900  |
| C  | 1.40608600  | 0.43831800  | 3.72776300  |
| C  | 0.12542300  | -0.05311400 | 0.68247500  |
| C  | 0.32974400  | -0.17261800 | -0.56070700 |
| Sc | -1.48697600 | -1.50124000 | -0.07664300 |
| Sc | 0.12901500  | 2.08985300  | -0.12549300 |

**The coordinates of optimized of Sc<sub>2</sub>C<sub>2</sub>@C<sub>84</sub>**

|   |            |             |             |
|---|------------|-------------|-------------|
| C | 4.34997500 | 0.51303800  | -0.51224400 |
| C | 4.34997100 | -0.51304600 | 0.51224800  |
| C | 3.82205900 | 0.17627300  | -1.81187800 |
| C | 3.82301000 | 1.81583900  | -0.17638400 |
| C | 3.82300400 | -1.81584500 | 0.17638800  |
| C | 3.82205600 | -0.17628100 | 1.81188100  |

|   |             |             |             |
|---|-------------|-------------|-------------|
| C | 3.39630400  | -1.15548500 | -2.19246500 |
| C | 3.39705000  | -2.19632700 | -1.15405500 |
| C | 3.39705200  | 2.19632000  | 1.15405800  |
| C | 3.39630300  | 1.15547800  | 2.19246800  |
| C | 3.08148000  | 1.30826100  | -2.30595000 |
| C | 3.08461600  | 2.31269900  | -1.30665800 |
| C | 3.08461200  | -2.31270800 | 1.30666200  |
| C | 3.08147700  | -1.30826900 | 2.30595500  |
| C | 2.46692500  | -1.23850800 | -3.23807900 |
| C | 2.46545200  | -3.24055100 | -1.23594900 |
| C | 2.46545600  | 3.24054400  | 1.23595100  |
| C | 2.46692500  | 1.23850300  | 3.23808100  |
| C | 2.04168000  | 1.21620400  | -3.28081400 |
| C | 2.04455200  | 3.28919700  | -1.21571500 |
| C | 2.04454600  | -3.28920200 | 1.21571700  |
| C | 2.04167600  | -1.21620900 | 3.28081600  |
| C | 1.82183700  | -0.06555000 | -3.81146600 |
| C | 1.82300400  | -3.81927200 | -0.06492000 |
| C | 1.82301000  | 3.81926900  | 0.06492200  |
| C | 1.82183400  | 0.06554500  | 3.81146800  |
| C | 1.51352400  | -2.31147100 | -3.28200300 |
| C | 1.51214900  | -3.28436700 | -2.30910900 |
| C | 1.51215300  | 3.28436300  | 2.30911100  |
| C | 1.51352600  | 2.31146700  | 3.28200500  |
| C | 0.96703700  | 2.20286700  | -3.23418700 |
| C | 0.96836600  | 3.24135400  | -2.20005500 |
| C | 0.96835900  | -3.24135700 | 2.20005600  |
| C | 0.96703100  | -2.20286900 | 3.23418900  |
| C | 0.51065800  | -0.46185500 | -4.21437400 |
| C | 0.51099300  | -4.22151200 | -0.46180400 |
| C | 0.51100000  | 4.22151200  | 0.46180600  |
| C | 0.51065600  | 0.46185400  | 4.21437600  |
| C | 0.26840800  | -1.81782300 | -3.79431400 |
| C | 0.26783300  | -3.79972600 | -1.81706000 |
| C | 0.26783900  | 3.79972500  | 1.81706100  |
| C | 0.26841000  | 1.81782300  | 3.79431600  |
| C | -0.26840600 | 1.81852500  | -3.79397700 |
| C | -0.26783100 | 3.80006100  | -1.81635800 |
| C | -0.26783900 | -3.80006200 | 1.81636000  |
| C | -0.26841100 | -1.81852600 | 3.79398000  |
| C | -0.51065500 | 0.46263400  | -4.21428900 |
| C | -0.51099200 | 4.22159700  | -0.46102500 |
| C | -0.51100000 | -4.22159800 | 0.46102600  |
| C | -0.51065800 | -0.46263400 | 4.21429100  |

|    |             |             |             |
|----|-------------|-------------|-------------|
| C  | -0.96703500 | -2.20226700 | -3.23459400 |
| C  | -0.96836400 | -3.24094500 | -2.20065300 |
| C  | -0.96835900 | 3.24094700  | 2.20065300  |
| C  | -0.96703100 | 2.20226900  | 3.23459400  |
| C  | -1.51352200 | 2.31207700  | -3.28157600 |
| C  | -1.51214700 | 3.28479300  | -2.30850200 |
| C  | -1.51215400 | -3.28479000 | 2.30850300  |
| C  | -1.51352800 | -2.31207500 | 3.28157800  |
| C  | -1.82183400 | 0.06625500  | -3.81145500 |
| C  | -1.82300200 | 3.81928300  | -0.06421600 |
| C  | -1.82301000 | -3.81928000 | 0.06421600  |
| C  | -1.82183600 | -0.06625100 | 3.81145500  |
| C  | -2.04167900 | -1.21559600 | -3.28103900 |
| C  | -2.04455000 | -3.28897000 | -1.21632200 |
| C  | -2.04454400 | 3.28897500  | 1.21632300  |
| C  | -2.04167700 | 1.21560000  | 3.28103900  |
| C  | -2.46692400 | 1.23910700  | -3.23785200 |
| C  | -2.46545000 | 3.24077700  | -1.23535100 |
| C  | -2.46545700 | -3.24077100 | 1.23535200  |
| C  | -2.46692700 | -1.23910200 | 3.23785300  |
| C  | -3.08147900 | -1.30783400 | -2.30619200 |
| C  | -3.08461500 | -2.31245700 | -1.30708500 |
| C  | -3.08461000 | 2.31246500  | 1.30708700  |
| C  | -3.08147700 | 1.30784200  | 2.30619400  |
| C  | -3.39630300 | 1.15589100  | -2.19225500 |
| C  | -3.39704900 | 2.19654000  | -1.15365200 |
| C  | -3.39705500 | -2.19653200 | 1.15365200  |
| C  | -3.39630600 | -1.15588300 | 2.19225500  |
| C  | -3.82206000 | -0.17593800 | -1.81191200 |
| C  | -3.82301200 | -1.81580500 | -0.17672100 |
| C  | -3.82300300 | 1.81581200  | 0.17672100  |
| C  | -3.82205700 | 0.17594700  | 1.81191100  |
| C  | -4.34997800 | -0.51294200 | -0.51234100 |
| C  | -4.34997300 | 0.51295300  | 0.51234100  |
| C  | -0.00002500 | 0.63361100  | -0.00002500 |
| C  | 0.00002200  | -0.63359500 | -0.00000600 |
| Sc | 2.23718500  | 0.00000500  | -0.00000400 |
| Sc | -2.23718700 | -0.00000800 | -0.00000700 |

**The coordinates of optimized of  $\text{Sc}_2\text{C}_2@C_{80}C[12]CPP$**

|   |            |             |             |
|---|------------|-------------|-------------|
| C | 2.89761300 | -6.30815800 | -1.55680700 |
| C | 4.17514800 | -5.78090000 | -1.46485300 |
| C | 4.90745100 | -5.86379400 | -0.27360500 |
| C | 4.35019300 | -6.58831400 | 0.78696700  |

|   |              |             |             |
|---|--------------|-------------|-------------|
| C | 3.06989200   | -7.12204200 | 0.69176100  |
| C | 6.09330700   | -4.99018800 | -0.12645800 |
| C | 6.89718300   | -4.66219700 | -1.22702500 |
| C | 7.70768000   | -3.53770500 | -1.20431100 |
| C | 7.73544200   | -2.69612700 | -0.08327600 |
| C | 7.08486200   | -3.13578500 | 1.07579600  |
| C | 6.27677900   | -4.26556700 | 1.05579600  |
| C | 8.15089000   | -1.27736800 | -0.19054600 |
| C | 7.91964100   | -0.60696700 | -1.39777500 |
| C | 7.89004000   | 0.77818100  | -1.45351800 |
| C | 8.08898700   | 1.54915200  | -0.30340700 |
| C | 8.48144300   | 0.88276300  | 0.86646000  |
| C | 8.51069800   | -0.50458600 | 0.92272400  |
| C | 7.60739000   | 2.95024200  | -0.29493500 |
| C | 7.55439500   | 3.72543400  | -1.46221800 |
| C | 6.73886500   | 4.84642200  | -1.53845300 |
| C | 5.95818800   | 5.24153400  | -0.44447000 |
| C | 6.13943300   | 4.56168900  | 0.76610800  |
| C | 6.94209300   | 3.43215000  | 0.83833600  |
| C | 4.78624500   | 6.13631100  | -0.58508500 |
| C | 3.99693700   | 6.05723000  | -1.73841700 |
| C | 2.69690800   | 6.54740600  | -1.75007400 |
| C | 2.14013200   | 7.14095600  | -0.61155000 |
| C | 2.99152700   | 7.37150800  | 0.48012400  |
| C | 4.28566300   | 6.87411600  | 0.49634900  |
| C | 0.67093400   | 7.29817300  | -0.48892400 |
| C | -0.16999400  | 7.39858900  | -1.60441900 |
| C | -1.54712500  | 7.26043500  | -1.47964300 |
| C | -2.14492100  | 7.04429300  | -0.23159300 |
| C | -1.31136500  | 7.04484400  | 0.89394900  |
| C | 0.06474900   | 7.15103000  | 0.76656800  |
| C | -7.49466900  | 4.92842200  | -0.05077500 |
| C | -7.88356300  | 4.29183000  | -1.23292300 |
| C | -8.77881000  | 3.22930400  | -1.20112900 |
| C | -9.31992100  | 2.78192100  | 0.01017400  |
| C | -9.08348000  | 3.55328400  | 1.15669800  |
| C | -8.17666900  | 4.60269500  | 1.12884000  |
| C | -9.79799900  | 1.38035000  | 0.10427700  |
| C | -10.38234200 | 0.69282300  | -0.96815100 |
| C | -10.34969200 | -0.69569400 | -1.02574500 |
| C | -9.72464600  | -1.44398600 | -0.01745400 |
| C | -9.32111500  | -0.76083700 | 1.13579700  |
| C | -9.35955000  | 0.62257400  | 1.19641200  |
| C | -9.18682700  | -2.80888500 | -0.24240700 |

|   |             |             |             |
|---|-------------|-------------|-------------|
| C | -8.74398100 | -3.16550800 | -1.52271900 |
| C | -7.82702400 | -4.19067700 | -1.70196700 |
| C | -7.29740500 | -4.88100700 | -0.60503900 |
| C | -7.87607600 | -4.64636000 | 0.64846500  |
| C | -8.81508700 | -3.63896000 | 0.82360200  |
| C | -6.03014400 | -5.64092100 | -0.72257900 |
| C | -5.06546300 | -5.19894200 | -1.63826500 |
| C | -3.78450400 | -5.72834900 | -1.64071200 |
| C | -3.41160200 | -6.70706500 | -0.71271000 |
| C | -4.38395900 | -7.18785200 | 0.17069500  |
| C | -5.67487400 | -6.67112700 | 0.15764800  |
| C | -1.98140500 | -7.07845200 | -0.62320000 |
| C | -1.22188600 | -7.30504500 | -1.77752000 |
| C | 0.16112000  | -7.38218900 | -1.71393100 |
| C | 0.06994500  | -7.08599800 | 0.66638000  |
| C | -1.31796400 | -7.03443900 | 0.60646000  |
| C | 0.83818200  | -7.20690700 | -0.49819000 |
| C | 2.29618300  | -6.94439000 | -0.46323500 |
| C | -5.28584200 | 5.33917800  | 0.95879300  |
| C | -6.22630600 | 5.69418800  | -0.01604700 |
| C | -5.83882000 | 6.60490700  | -1.00443800 |
| C | -4.53977500 | 7.10083400  | -1.04518400 |
| C | -3.57863200 | 6.68909200  | -0.11253800 |
| C | -3.98775900 | 5.81978200  | 0.90692700  |
| H | 2.32135300  | -6.12578900 | -2.45881200 |
| H | 4.56661500  | -5.19798200 | -2.29335400 |
| H | 4.91205900  | -6.70741400 | 1.70935200  |
| H | 2.65425800  | -7.65742100 | 1.54055800  |
| H | 6.83771500  | -5.26152100 | -2.13121600 |
| H | 8.27427500  | -3.27064500 | -2.09169900 |
| H | 7.08713400  | -2.50998800 | 1.96318500  |
| H | 5.67569600  | -4.50180700 | 1.92954300  |
| H | 7.61660000  | -1.16997200 | -2.27507500 |
| H | 7.56222900  | 1.25717700  | -2.37151900 |
| H | 8.71057600  | 1.45622600  | 1.76022800  |
| H | 8.76285600  | -0.99427100 | 1.85919900  |
| H | 8.11538500  | 3.41476400  | -2.33902100 |
| H | 6.66821900  | 5.39454000  | -2.47403700 |
| H | 5.53571800  | 4.83330100  | 1.62732000  |
| H | 6.94406900  | 2.84664900  | 1.75327300  |
| H | 4.34915100  | 5.47967700  | -2.58897100 |
| H | 2.06959500  | 6.33754800  | -2.61218700 |
| H | 2.62062000  | 7.90672800  | 1.34891000  |
| H | 4.90230300  | 7.01734100  | 1.37927700  |

|   |              |             |             |
|---|--------------|-------------|-------------|
| H | 0.25800300   | 7.54607600  | -2.59163800 |
| H | -2.16073800  | 7.26255600  | -2.37577200 |
| H | -1.74005100  | 6.92167900  | 1.88394600  |
| H | 0.68003300   | 7.05230000  | 1.65556400  |
| H | -7.37410400  | 4.53459300  | -2.16149400 |
| H | -8.94397600  | 2.65116300  | -2.10551600 |
| H | -9.55163500  | 3.27509300  | 2.09685500  |
| H | -7.93861400  | 5.13498900  | 2.04589800  |
| H | -10.80004200 | 1.25156700  | -1.80150400 |
| H | -10.74784000 | -1.19934600 | -1.90233600 |
| H | -8.82810200  | -1.30073500 | 1.93738900  |
| H | -8.89711400  | 1.12050100  | 2.04265700  |
| H | -9.02869600  | -2.56037000 | -2.37797100 |
| H | -7.45430200  | -4.40027900 | -2.70024700 |
| H | -7.51173300  | -5.18472100 | 1.51860100  |
| H | -9.19260800  | -3.43627400 | 1.82154600  |
| H | -5.29486900  | -4.37176200 | -2.30261000 |
| H | -3.03521900  | -5.32442200 | -2.31790400 |
| H | -4.12135500  | -7.96906100 | 0.87911700  |
| H | -6.41217300  | -7.06029100 | 0.85426000  |
| H | -1.72528800  | -7.39474300 | -2.73629400 |
| H | 0.72619600   | -7.54775300 | -2.62620900 |
| H | 0.56193300   | -6.93302000 | 1.62254600  |
| H | -1.88826900  | -6.84917000 | 1.51320500  |
| H | -5.55442700  | 4.60643400  | 1.71429800  |
| H | -6.55912600  | 6.91716000  | -1.75601700 |
| H | -4.26589900  | 7.81024400  | -1.82097100 |
| H | -3.26549800  | 5.45481800  | 1.63069000  |
| C | 3.51062400   | 1.98812000  | -2.23349300 |
| C | 3.35755400   | 0.80741200  | -2.95134600 |
| C | 2.41828500   | 2.90104600  | -2.11650700 |
| C | 2.10994200   | 0.50047500  | -3.58177200 |
| C | 1.17957000   | 2.62860900  | -2.72429700 |
| C | 1.01350600   | 1.38883100  | -3.49238700 |
| C | 4.21758100   | 1.97031700  | -0.97297800 |
| C | 3.92757500   | -0.42114300 | -2.45125300 |
| C | 2.46372700   | 3.47637700  | -0.77736600 |
| C | 1.92582700   | -0.93326700 | -3.51388300 |
| C | 0.02077800   | 3.19773700  | -2.07099100 |
| C | -0.29032500  | 0.80239700  | -3.58758500 |
| C | 3.54698500   | 2.84650000  | -0.05916900 |
| C | 3.01791300   | -1.49032500 | -2.73632400 |
| C | 4.77493400   | 0.79851700  | -0.50081400 |
| C | 4.62340100   | -0.42885300 | -1.25607300 |

|   |             |             |             |
|---|-------------|-------------|-------------|
| C | 1.32163900  | 3.99505100  | -0.12680500 |
| C | 0.64422700  | -1.48765200 | -3.46414600 |
| C | 0.05037400  | 3.95621200  | -0.83818200 |
| C | -0.46781900 | -0.60903700 | -3.55914100 |
| C | -1.24061500 | 2.53672200  | -2.15790000 |
| C | -1.42395200 | 1.38196500  | -2.94053500 |
| C | 3.42889400  | 2.52309300  | 1.31198300  |
| C | 2.80471400  | -2.52589900 | -1.80719700 |
| C | 4.70713800  | 0.47934300  | 0.90003900  |
| C | 4.46528300  | -1.51612600 | -0.33374400 |
| C | -1.20841800 | 3.68946600  | -0.12880900 |
| C | -1.69525400 | -0.91055400 | -2.86055400 |
| C | -1.96376200 | 2.75691000  | -0.95527300 |
| C | -2.27360700 | 0.35822700  | -2.45993700 |
| C | 1.27424000  | 3.80960400  | 1.29892000  |
| C | 0.44966300  | -2.68664400 | -2.68115700 |
| C | 3.99986500  | 1.27753400  | 1.82215000  |
| C | 3.52902700  | -2.54872700 | -0.54486900 |
| C | 4.66244200  | -0.95819500 | 0.98410000  |
| C | 2.30215700  | 3.07479200  | 1.98645500  |
| C | 1.50580800  | -3.14356100 | -1.84265900 |
| C | -1.23414900 | 3.46427900  | 1.31052700  |
| C | -2.83671900 | 1.71908900  | -0.45612400 |
| C | 0.02614300  | 3.57891400  | 2.00430400  |
| C | -2.97634000 | 0.49170900  | -1.23076400 |
| C | -1.90839700 | -2.12495500 | -2.14177400 |
| C | -0.81914400 | -3.10695400 | -2.11962700 |
| C | 1.72227800  | 2.43906600  | 3.12178800  |
| C | 0.92834100  | -3.82591900 | -0.73189900 |
| C | 4.11166900  | -1.56244200 | 2.06781800  |
| C | 3.39786200  | 0.62013100  | 2.99455900  |
| C | 2.92720600  | -3.20773800 | 0.63046300  |
| C | 0.33041400  | 2.73105100  | 3.12748200  |
| C | -0.50829100 | -3.85145400 | -0.89278200 |
| C | -2.99223500 | 1.66979400  | 0.94559300  |
| C | -3.24721500 | -0.72265600 | -0.53516800 |
| C | -2.13688000 | 2.48415300  | 1.80627000  |
| C | -2.69965100 | -2.00167300 | -0.95982700 |
| C | 3.56562700  | -0.77065100 | 3.13866500  |
| C | 3.31808200  | -2.76083900 | 1.90832100  |
| C | 2.23297300  | 1.21528300  | 3.64821300  |
| C | 1.61613300  | -3.84916100 | 0.53630700  |
| C | -3.23278700 | 0.44294600  | 1.61479800  |
| C | -3.35375000 | -0.74271200 | 0.87720300  |

|    |             |             |             |
|----|-------------|-------------|-------------|
| C  | -1.85875800 | 1.68898300  | 2.97815900  |
| C  | -2.41679100 | -2.76520400 | 0.24317900  |
| C  | -0.61246300 | 1.79445600  | 3.64937500  |
| C  | -1.31109200 | -3.67733700 | 0.31161600  |
| C  | 2.59277900  | -1.60004300 | 3.80093600  |
| C  | 2.44414700  | -2.82130800 | 3.04529900  |
| C  | 1.31525300  | 0.39572000  | 4.34136300  |
| C  | 0.79046600  | -3.95093000 | 1.67270300  |
| C  | -2.52089800 | 0.43231700  | 2.85842500  |
| C  | -2.79979500 | -1.96517900 | 1.37497200  |
| C  | -0.10931800 | 0.64786400  | 4.28660000  |
| C  | -0.65380500 | -3.75530100 | 1.56249600  |
| C  | 1.48810600  | -1.02342700 | 4.39797000  |
| C  | 1.19656400  | -3.41666200 | 2.93249500  |
| C  | -1.94454600 | -0.76562700 | 3.38173000  |
| C  | -2.09205300 | -2.00940400 | 2.61180600  |
| C  | -0.80010900 | -0.61106800 | 4.19886300  |
| C  | -1.09039900 | -3.00578200 | 2.71263600  |
| C  | 0.18920100  | -1.64674900 | 4.28944200  |
| C  | 0.04790700  | -2.82114400 | 3.56829500  |
| C  | 0.64100200  | -0.24825900 | 0.98196800  |
| C  | 1.31732500  | 0.01996600  | -0.05299700 |
| Sc | -0.27011800 | -1.66409600 | -0.49831000 |
| Sc | 0.17233700  | 1.94509500  | 0.17510000  |

**The coordinates of optimized of Sc<sub>2</sub>C<sub>2</sub>@C<sub>82</sub>C[12]CPP**

|   |            |             |             |
|---|------------|-------------|-------------|
| C | 3.10981500 | 7.75208100  | 0.32032300  |
| C | 4.38474200 | 7.21170200  | 0.25361000  |
| C | 4.75166900 | 6.34957200  | -0.79056000 |
| C | 3.85783600 | 6.23024800  | -1.86284800 |
| C | 2.58202100 | 6.77330600  | -1.79984800 |
| C | 5.88546400 | 5.40068300  | -0.65307100 |
| C | 6.37405000 | 5.07417000  | 0.62107200  |
| C | 7.17332100 | 3.96067200  | 0.82637300  |
| C | 7.49255100 | 3.09804500  | -0.22925800 |
| C | 7.11599300 | 3.49313700  | -1.51933500 |
| C | 6.34363400 | 4.62820800  | -1.72866300 |
| C | 7.95835800 | 1.71400600  | 0.01780700  |
| C | 7.54818900 | 1.06003400  | 1.18501500  |
| C | 7.59778000 | -0.32165400 | 1.28943000  |
| C | 8.05762400 | -1.11183900 | 0.22987800  |
| C | 8.64079300 | -0.44493400 | -0.85908600 |
| C | 8.58947700 | 0.93823700  | -0.96484600 |
| C | 7.67587600 | -2.54430500 | 0.17159700  |

|   |              |             |             |
|---|--------------|-------------|-------------|
| C | 7.25179600   | -3.24441800 | 1.30986600  |
| C | 6.49414600   | -4.40225100 | 1.19836500  |
| C | 6.16560800   | -4.93806200 | -0.05449700 |
| C | 6.75085200   | -4.34039000 | -1.17870400 |
| C | 7.46937400   | -3.15966900 | -1.07017400 |
| C | 5.06382400   | -5.91995500 | -0.19480900 |
| C | 4.61042200   | -6.70746200 | 0.87331400  |
| C | 3.37323500   | -7.33778500 | 0.82370300  |
| C | 2.54703300   | -7.21489100 | -0.30089600 |
| C | 3.06509100   | -6.55160500 | -1.41835600 |
| C | 4.29212700   | -5.91206400 | -1.36394400 |
| C | 1.09941100   | -7.52202000 | -0.27307800 |
| C | 0.36822100   | -7.27820100 | 0.89533000  |
| C | -1.01836500  | -7.21157800 | 0.86642400  |
| C | -1.71699100  | -7.37830100 | -0.33342800 |
| C | -0.99421200  | -7.74541500 | -1.47505100 |
| C | 0.39040900   | -7.82034200 | -1.44438500 |
| C | -6.92657200  | -4.97096000 | -0.38340200 |
| C | -7.24816400  | -4.31591200 | 0.80982900  |
| C | -8.15107100  | -3.26129200 | 0.81844600  |
| C | -8.76510100  | -2.83116700 | -0.36401600 |
| C | -8.56290500  | -3.59150200 | -1.52324200 |
| C | -7.65496800  | -4.64139500 | -1.53357900 |
| C | -9.32398000  | -1.45882700 | -0.41212600 |
| C | -9.93153800  | -0.84636500 | 0.69207300  |
| C | -10.00361800 | 0.53799800  | 0.78661700  |
| C | -9.46247200  | 1.35530100  | -0.21583000 |
| C | -9.03270900  | 0.73593400  | -1.39563300 |
| C | -8.96725400  | -0.64521700 | -1.49315900 |
| C | -9.02386200  | 2.74993800  | 0.03709000  |
| C | -8.53130000  | 3.07997800  | 1.30652700  |
| C | -7.67699700  | 4.15812300  | 1.48129800  |
| C | -7.26869700  | 4.93270100  | 0.38903900  |
| C | -7.90958200  | 4.71868700  | -0.83737500 |
| C | -8.78153200  | 3.65104700  | -1.00769200 |
| C | -6.03443800  | 5.74900600  | 0.46069200  |
| C | -4.96587000  | 5.25913500  | 1.22340300  |
| C | -3.70725500  | 5.83073100  | 1.14187700  |
| C | -3.46302300  | 6.91247000  | 0.28793500  |
| C | -4.54291300  | 7.44711100  | -0.42474800 |
| C | -5.80849700  | 6.87705500  | -0.33740400 |
| C | -2.06281600  | 7.34277800  | 0.07706000  |
| C | -1.14045500  | 7.30115700  | 1.12870000  |
| C | 0.21763200   | 7.44031800  | 0.88846800  |

|   |              |             |             |
|---|--------------|-------------|-------------|
| C | -0.22607800  | 7.78932100  | -1.44549100 |
| C | -1.58621700  | 7.63737600  | -1.20620000 |
| C | 0.70450300   | 7.64245300  | -0.41004800 |
| C | 2.15210200   | 7.46247300  | -0.66107600 |
| C | -4.81950800  | -5.62210900 | -1.51485400 |
| C | -5.70723500  | -5.80915400 | -0.44836400 |
| C | -5.31395400  | -6.64635000 | 0.60250700  |
| C | -4.04999300  | -7.22294200 | 0.61758900  |
| C | -3.13929900  | -6.98002800 | -0.41731200 |
| C | -3.55636300  | -6.19556500 | -1.49913800 |
| H | 2.83426900   | 8.36344500  | 1.17485600  |
| H | 5.08254000   | 7.41916200  | 1.05855000  |
| H | 4.09827100   | 5.58729100  | -2.70283700 |
| H | 1.87140300   | 6.53742400  | -2.58734800 |
| H | 6.05698800   | 5.64557600  | 1.48670500  |
| H | 7.49548800   | 3.72236900  | 1.83562100  |
| H | 7.34715800   | 2.85397400  | -2.36640000 |
| H | 6.03968100   | 4.87021200  | -2.74211800 |
| H | 7.05263200   | 1.62079200  | 1.97219000  |
| H | 7.14568100   | -0.78696400 | 2.15905200  |
| H | 9.09275400   | -1.01549200 | -1.66470100 |
| H | 8.99838900   | 1.41782900  | -1.84966600 |
| H | 7.44384400   | -2.84108700 | 2.29936700  |
| H | 6.07860600   | -4.84137700 | 2.10038300  |
| H | 6.58476300   | -4.76121000 | -2.16503000 |
| H | 7.79386000   | -2.66618100 | -1.98053300 |
| H | 5.21072100   | -6.79548500 | 1.77403400  |
| H | 3.02508300   | -7.89813800 | 1.68696800  |
| H | 2.44412600   | -6.41812800 | -2.29902700 |
| H | 4.58906200   | -5.29973100 | -2.20874800 |
| H | 0.89237600   | -7.02257500 | 1.81176000  |
| H | -1.55769600  | -6.91161800 | 1.76108400  |
| H | -1.52449600  | -7.93521900 | -2.40410900 |
| H | 0.93351800   | -8.07193900 | -2.35091300 |
| H | -6.69542100  | -4.55297900 | 1.71465200  |
| H | -8.28268600  | -2.68313300 | 1.72831900  |
| H | -9.07645800  | -3.31686300 | -2.44062700 |
| H | -7.46732000  | -5.18265500 | -2.45695900 |
| H | -10.28568700 | -1.45843400 | 1.51732900  |
| H | -10.41643800 | 0.98958400  | 1.68457700  |
| H | -8.60310200  | 1.33599500  | -2.19136400 |
| H | -8.49255400  | -1.08922500 | -2.36287100 |
| H | -8.71874400  | 2.41534200  | 2.14438800  |
| H | -7.24857000  | 4.34592300  | 2.46159700  |

|   |             |             |             |
|---|-------------|-------------|-------------|
| H | -7.63678000 | 5.32380500  | -1.69745200 |
| H | -9.20221700 | 3.46055900  | -1.99096600 |
| H | -5.09806000 | 4.36123300  | 1.81961300  |
| H | -2.88200400 | 5.37748400  | 1.68569900  |
| H | -4.38620100 | 8.31198300  | -1.06386600 |
| H | -6.62805500 | 7.30101600  | -0.91143000 |
| H | -1.48799800 | 7.10299300  | 2.13872900  |
| H | 0.91720700  | 7.30424000  | 1.70805200  |
| H | 0.12115600  | 7.97566400  | -2.45791200 |
| H | -2.28354100 | 7.67463100  | -2.03850600 |
| H | -5.08959200 | -4.94560000 | -2.32091800 |
| H | -6.00082000 | -6.83090200 | 1.42414300  |
| H | -3.75589700 | -7.85715000 | 1.44955800  |
| H | -2.84907500 | -5.95871200 | -2.29012300 |
| C | -2.38302100 | 1.31309700  | 2.79995400  |
| C | -3.02635200 | 0.13663500  | 2.34604600  |
| C | -2.23742400 | 2.47587200  | 1.94900900  |
| C | -1.23888500 | 1.25857800  | 3.66759400  |
| C | -2.52689600 | -1.11050500 | 2.82996700  |
| C | -3.61174700 | 0.14032200  | 1.02076800  |
| C | -2.53776000 | -2.30371700 | 2.00318900  |
| C | -1.38686700 | -1.16703000 | 3.68747200  |
| C | -3.28100900 | 1.24961300  | 0.16237000  |
| C | -3.69044700 | -1.07181500 | 0.19558800  |
| C | -2.58810700 | 2.43767300  | 0.58766600  |
| C | -3.15393400 | 0.76713300  | -1.17008600 |
| C | -1.80298400 | 3.18168900  | -0.39393200 |
| C | -1.05642800 | 3.15900500  | 2.37874500  |
| C | -3.09131900 | -2.31988100 | 0.67714600  |
| C | -3.37611600 | -0.64836000 | -1.16333100 |
| C | -2.35012500 | -3.10241600 | -0.26534500 |
| C | -1.37402300 | -3.07110500 | 2.36833300  |
| C | -2.17881800 | -2.72263500 | -1.65457300 |
| C | -1.19896600 | -3.89254900 | 0.09516800  |
| C | -2.65321500 | -1.46310000 | -2.11334500 |
| C | -1.92343000 | -0.80572300 | -3.12413100 |
| C | -1.83619600 | 0.63599900  | -3.17158500 |
| C | -0.67813900 | -1.34068600 | -3.59990400 |
| C | -0.94849100 | -3.25919300 | -2.12194300 |
| C | -0.76028400 | 3.99644200  | 0.10594500  |
| C | -0.33188400 | 3.90275400  | 1.47945400  |
| C | 0.41503100  | 4.28657300  | -0.66655300 |
| C | -1.69446300 | 2.68707500  | -1.77048700 |
| C | -2.36485300 | 1.44967900  | -2.15463600 |

|   |             |             |             |
|---|-------------|-------------|-------------|
| C | -0.55624800 | 3.05302900  | -2.52323400 |
| C | -0.57912200 | 0.95587900  | -3.77289700 |
| C | -0.67183700 | -3.85466900 | 1.41208200  |
| C | -0.34401500 | -3.99463200 | -1.04633000 |
| C | 0.73750600  | -3.98909000 | 1.57143900  |
| C | -0.68240000 | -2.38041000 | 3.41343500  |
| C | 1.59561600  | -4.06641400 | 0.43150600  |
| C | 1.42820900  | -3.28976500 | 2.61052700  |
| C | 1.06896000  | -4.01608300 | -0.89296000 |
| C | 1.86544900  | -3.36094500 | -1.87508100 |
| C | 1.26439800  | -2.61835100 | -2.94180600 |
| C | 3.09410800  | -2.71486700 | -1.52405200 |
| C | 2.84238400  | -3.44108400 | 0.76564000  |
| C | -0.15141100 | -2.53629500 | -3.06363000 |
| C | 0.18021800  | -0.24210700 | -3.95846800 |
| C | 2.10292500  | -1.50271700 | -3.24964700 |
| C | 0.73555800  | -2.43464300 | 3.51605800  |
| C | 2.73360600  | -2.95330400 | 2.12581900  |
| C | 1.41623700  | -1.27101800 | 3.96868300  |
| C | 2.70912300  | -0.92894100 | 3.46261800  |
| C | 0.71192500  | -0.05274900 | 4.23790000  |
| C | 3.41795200  | -1.76971600 | 2.55169500  |
| C | 4.32778300  | -1.14754200 | 1.61926900  |
| C | 4.45444700  | -1.64994600 | 0.23291600  |
| C | 4.32047600  | 0.30121500  | 1.55788500  |
| C | 2.78160700  | 0.51625300  | 3.40485300  |
| C | 3.65319600  | -2.77045000 | -0.20938900 |
| C | 3.22470600  | -1.54890500 | -2.37797700 |
| C | 4.51758100  | -0.48371000 | -0.63249800 |
| C | -0.69856200 | 0.02020600  | 4.07904200  |
| C | 1.55388500  | 1.04771200  | 3.88686500  |
| C | -0.38682800 | 2.37889200  | 3.37377900  |
| C | 1.02454600  | 2.26139400  | 3.36622600  |
| C | 1.80827800  | 3.00965300  | 2.38256600  |
| C | 1.10824800  | 3.90857700  | 1.54103700  |
| C | 3.53052100  | 2.84745300  | 0.60779800  |
| C | 3.07244500  | 2.45661500  | 1.89232700  |
| C | 2.75772100  | 3.71008800  | -0.23655200 |
| C | 4.20633300  | 1.92712700  | -0.26593100 |
| C | 3.52271800  | 1.16063000  | 2.39403900  |
| C | 1.56905300  | 4.22538800  | 0.22016600  |
| C | 4.55976800  | 0.67696400  | 0.20221400  |
| C | 2.86202200  | 3.22009500  | -1.60276100 |
| C | 1.77110100  | 3.26947300  | -2.43562700 |

|    |             |             |             |
|----|-------------|-------------|-------------|
| C  | 3.69902600  | 2.05670600  | -1.60444000 |
| C  | 1.48046300  | 2.16984100  | -3.30824900 |
| C  | 0.51347400  | 3.82315900  | -1.95424600 |
| C  | 3.40348100  | 0.92130800  | -2.40097900 |
| C  | 3.86220600  | -0.37939200 | -1.91308400 |
| C  | 2.24390500  | 0.97757500  | -3.29317000 |
| C  | 0.04818200  | 2.13401400  | -3.45519800 |
| C  | 1.56780000  | -0.25867600 | -3.68654400 |
| C  | 0.49123300  | -0.11504000 | -0.52940600 |
| C  | 0.49912100  | 0.42383800  | 0.61544700  |
| Sc | -1.54330500 | -0.62625500 | 0.39538600  |
| Sc | 2.38298100  | -0.89563000 | 0.52782200  |

**The coordinates of optimized of Sc<sub>2</sub>C<sub>2</sub>@C<sub>84</sub>C[12]CPP**

|   |              |             |             |
|---|--------------|-------------|-------------|
| C | -9.99912100  | -0.64388900 | 0.14319900  |
| C | -10.00505800 | 0.74595100  | 0.13790200  |
| C | -9.22550800  | 1.46416100  | -0.77895900 |
| C | -8.58624800  | 0.74281500  | -1.79427800 |
| C | -8.58092900  | -0.64331400 | -1.78948900 |
| C | -8.79879200  | 2.86616500  | -0.54974100 |
| C | -8.51943800  | 3.27911900  | 0.75941000  |
| C | -7.69775300  | 4.37011400  | 1.00141900  |
| C | -7.11707300  | 5.07798200  | -0.05740600 |
| C | -7.54160500  | 4.77646700  | -1.35711000 |
| C | -8.37485700  | 3.69155100  | -1.59877400 |
| C | -5.91201600  | 5.91238000  | 0.16031900  |
| C | -4.95536700  | 5.44984100  | 1.07248800  |
| C | -3.69480300  | 6.01985900  | 1.13640400  |
| C | -3.33701600  | 7.07525600  | 0.29053000  |
| C | -4.31836300  | 7.59391400  | -0.56405600 |
| C | -5.58425700  | 7.02155900  | -0.62909500 |
| C | -1.91050000  | 7.46575300  | 0.21937400  |
| C | -1.08158000  | 7.36802000  | 1.34278600  |
| C | 0.29910100   | 7.41965100  | 1.21728700  |
| C | 0.90398200   | 7.59591600  | -0.03351600 |
| C | 0.06940900   | 7.82886600  | -1.13457200 |
| C | -1.31114600  | 7.75479100  | -1.01264100 |
| C | 2.34983000   | 7.31790900  | -0.19529000 |
| C | 3.25844600   | 7.44944900  | 0.86332700  |
| C | 4.51322600   | 6.85702500  | 0.80570800  |
| C | 4.90675800   | 6.11883000  | -0.31717500 |
| C | 4.05251600   | 6.10590400  | -1.42642500 |
| C | 2.79933500   | 6.69527500  | -1.36631600 |
| C | 6.04185000   | 5.17011900  | -0.28962500 |

|   |              |             |             |
|---|--------------|-------------|-------------|
| C | 6.27937900   | 4.42657700  | 0.87239900  |
| C | 7.03952400   | 3.26648600  | 0.82980400  |
| C | 7.58976400   | 2.81215900  | -0.37528400 |
| C | 7.48832500   | 3.64450600  | -1.49738100 |
| C | 6.72575800   | 4.80322400  | -1.45565700 |
| C | 7.51166000   | -2.84786200 | -0.39740800 |
| C | 6.94774100   | -3.30199200 | 0.80077300  |
| C | 6.21074700   | -4.47669000 | 0.83868300  |
| C | 6.00358200   | -5.23313900 | -0.32102600 |
| C | 6.69048900   | -4.85550300 | -1.48196700 |
| C | 7.43237700   | -3.68293400 | -1.51951400 |
| C | 4.88571800   | -6.20340900 | -0.34937600 |
| C | 4.47446000   | -6.90779400 | 0.79056000  |
| C | 3.21790700   | -7.49276900 | 0.85094600  |
| C | 2.31882700   | -7.38618100 | -0.22061700 |
| C | 2.79336200   | -6.81855100 | -1.40804600 |
| C | 4.05321100   | -6.24061600 | -1.47263400 |
| C | 0.86702000   | -7.63455500 | -0.05535600 |
| C | 0.26899700   | -7.46449300 | 1.20019600  |
| C | -1.10932900  | -7.39107300 | 1.33439000  |
| C | -1.94552000  | -7.45856600 | 0.21430000  |
| C | -1.35675800  | -7.74132500 | -1.02407200 |
| C | 0.02187700   | -7.83924800 | -1.15404400 |
| C | -3.36494300  | -7.04554900 | 0.29594200  |
| C | -3.70578900  | -5.99627200 | 1.15679100  |
| C | -4.95707500  | -5.40438200 | 1.10018200  |
| C | -5.91980000  | -5.83661600 | 0.17930200  |
| C | -5.61105700  | -6.94305800 | -0.62155500 |
| C | -4.35553400  | -7.53790500 | -0.56332400 |
| C | -7.11027700  | -4.98114300 | -0.03629500 |
| C | -7.68016700  | -4.26259500 | 1.02123100  |
| C | -8.49628700  | -3.16771200 | 0.77700800  |
| C | -8.36298300  | -3.59184000 | -1.57985400 |
| C | -7.53529100  | -4.68025400 | -1.33613800 |
| C | -8.78107300  | -2.76103100 | -0.53292900 |
| C | -9.21413900  | -1.36227000 | -0.76876500 |
| C | 7.58753000   | -0.70485500 | -1.64303400 |
| C | 7.93383000   | -1.43310900 | -0.49841200 |
| C | 8.44710700   | -0.72819300 | 0.59771200  |
| C | 8.47319500   | 0.66006700  | 0.60217500  |
| C | 7.98591500   | 1.39035800  | -0.48908000 |
| C | 7.61325300   | 0.68158700  | -1.63831900 |
| H | -10.55858900 | -1.17750600 | 0.90690000  |
| H | -10.56902900 | 1.28036300  | 0.89770800  |

|   |             |             |             |
|---|-------------|-------------|-------------|
| H | -7.96651900 | 1.26727800  | -2.51497700 |
| H | -7.95796400 | -1.16824700 | -2.50711100 |
| H | -8.85014900 | 2.66923400  | 1.59492300  |
| H | -7.43097900 | 4.62313400  | 2.02366600  |
| H | -7.12573200 | 5.32695300  | -2.19649200 |
| H | -8.62478900 | 3.42881400  | -2.62293800 |
| H | -5.16650800 | 4.56565400  | 1.66693100  |
| H | -2.94414600 | 5.57349400  | 1.78250700  |
| H | -4.08085200 | 8.44146200  | -1.20131200 |
| H | -6.32097000 | 7.42465200  | -1.31895000 |
| H | -1.52079800 | 7.18652500  | 2.31955000  |
| H | 0.91491600  | 7.23081300  | 2.09171200  |
| H | 0.50611500  | 8.01691900  | -2.11094700 |
| H | -1.92982700 | 7.84278900  | -1.90116900 |
| H | 2.96438300  | 7.98567700  | 1.76094600  |
| H | 5.18172000  | 6.93320800  | 1.65892500  |
| H | 4.32311800  | 5.52612100  | -2.30434900 |
| H | 2.11647600  | 6.55837700  | -2.19892500 |
| H | 5.75799100  | 4.68564000  | 1.79010600  |
| H | 7.09384300  | 2.63853500  | 1.71452000  |
| H | 7.96469900  | 3.35077100  | -2.42854800 |
| H | 6.61333000  | 5.40401200  | -2.35384200 |
| H | 6.98066800  | -2.66908400 | 1.68320000  |
| H | 5.67820700  | -4.73639300 | 1.74886100  |
| H | 6.59988500  | -5.46080000 | -2.37960600 |
| H | 7.91730800  | -3.38501900 | -2.44498100 |
| H | 5.12926600  | -6.95735500 | 1.65615100  |
| H | 2.91312100  | -7.99842100 | 1.76231800  |
| H | 2.12549100  | -6.70263200 | -2.25594800 |
| H | 4.33479200  | -5.69287000 | -2.36733800 |
| H | 0.88981400  | -7.29654600 | 2.07490200  |
| H | -1.53971500 | -7.21530400 | 2.31619400  |
| H | -1.98071200 | -7.80767100 | -1.91079500 |
| H | 0.44750200  | -8.02580200 | -2.13536600 |
| H | -2.94901500 | -5.57459500 | 1.81329300  |
| H | -5.15527600 | -4.52763200 | 1.71009600  |
| H | -6.35435900 | -7.32578100 | -1.31584700 |
| H | -4.13273800 | -8.38221500 | -1.21007600 |
| H | -7.41329900 | -4.51337500 | 2.04400000  |
| H | -8.82135100 | -2.55227700 | 1.61070900  |
| H | -8.61575000 | -3.33264300 | -2.60420900 |
| H | -7.12640300 | -5.23702900 | -2.17472000 |
| H | 7.17411900  | -1.22348700 | -2.50369400 |
| H | 8.78326800  | -1.27301100 | 1.47549800  |

|   |             |             |             |
|---|-------------|-------------|-------------|
| H | 8.82797100  | 1.18540500  | 1.48454400  |
| H | 7.21489400  | 1.21909100  | -2.49394600 |
| C | -3.56201500 | -1.78057100 | 0.16566300  |
| C | -3.81224200 | -0.61977600 | 0.99814600  |
| C | -3.20895200 | -1.56237400 | -1.21594800 |
| C | -2.66681900 | -2.79925700 | 0.66456900  |
| C | -3.69896700 | 0.69154000  | 0.40147900  |
| C | -3.15356800 | -0.54826100 | 2.27943200  |
| C | -3.19808000 | -0.25886700 | -1.85073600 |
| C | -3.45554300 | 0.91834000  | -1.00726900 |
| C | -2.09474800 | -2.79275800 | 1.99397100  |
| C | -2.34818300 | -1.61583500 | 2.83755900  |
| C | -2.19344500 | -2.51860900 | -1.57871300 |
| C | -1.86626500 | -3.28075400 | -0.42938200 |
| C | -3.08644900 | 1.57553900  | 1.35794700  |
| C | -2.75070200 | 0.81594300  | 2.50601900  |
| C | -2.37424500 | -0.11981000 | -2.97651000 |
| C | -2.86706500 | 2.14505300  | -1.34954500 |
| C | -0.90049700 | -3.51020400 | 2.16377900  |
| C | -1.39126900 | -1.24320100 | 3.79105500  |
| C | -1.26400300 | -2.32673400 | -2.64698700 |
| C | -0.58817600 | -3.90271700 | -0.27309900 |
| C | -2.37401400 | 2.76422800  | 1.00673700  |
| C | -1.68712600 | 1.19692000  | 3.37990600  |
| C | -1.44363100 | -1.15615700 | -3.40291900 |
| C | -2.37004000 | 3.08817900  | -0.35853200 |
| C | -0.16886000 | -4.09944600 | 1.05165000  |
| C | -1.08626600 | 0.14791600  | 4.09556300  |
| C | -1.77240800 | 1.14616600  | -3.28804700 |
| C | -2.01084100 | 2.24735100  | -2.49789400 |
| C | 0.07117000  | -3.08551600 | 3.13439500  |
| C | -0.16862600 | -1.98491200 | 3.92465500  |
| C | 0.05004100  | -2.95257300 | -2.53596300 |
| C | 0.38948300  | -3.74106500 | -1.34682100 |
| C | -1.28772900 | 3.20018600  | 1.88045500  |
| C | -0.94396100 | 2.41410500  | 3.06905400  |
| C | -0.31951900 | -0.49678200 | -3.98599200 |
| C | -1.24781300 | 3.75802100  | -0.93794200 |
| C | 1.22081600  | -4.04346900 | 1.38697700  |
| C | 0.29924600  | 0.21040500  | 4.43414800  |
| C | -0.45990600 | 0.92710200  | -3.82338500 |
| C | -0.94880700 | 3.17037000  | -2.21852300 |
| C | 1.38943500  | -3.32262900 | 2.62178400  |
| C | 0.90272800  | -1.08028300 | 4.22718100  |

|   |             |             |             |
|---|-------------|-------------|-------------|
| C | 1.09879200  | -2.35459600 | -3.26457000 |
| C | 1.74752700  | -3.84917500 | -0.99058600 |
| C | -0.28295200 | 3.99841700  | 1.29591900  |
| C | 0.37198400  | 2.49753600  | 3.56771900  |
| C | 0.92377600  | -1.08739300 | -3.92544800 |
| C | 2.16086400  | -3.93216600 | 0.38658400  |
| C | -0.22973400 | 4.21132000  | -0.12791000 |
| C | 1.01099700  | 1.36350900  | 4.18328200  |
| C | 0.63483800  | 1.73459500  | -3.45360200 |
| C | 0.37994800  | 2.90902600  | -2.61426700 |
| C | 2.42857300  | -2.38166400 | 2.78752200  |
| C | 2.17193100  | -1.20798100 | 3.62677400  |
| C | 2.45467600  | -2.38137000 | -2.79577800 |
| C | 2.77285600  | -3.11619300 | -1.67681700 |
| C | 1.07855500  | 3.95001000  | 1.74979900  |
| C | 1.40024300  | 3.21146300  | 2.86632000  |
| C | 2.08169300  | -0.27766600 | -3.71917100 |
| C | 3.31596000  | -3.11632900 | 0.58446700  |
| C | 1.12474900  | 4.11358200  | -0.57034300 |
| C | 2.36240300  | 1.27545600  | 3.73189800  |
| C | 1.94549600  | 1.09134000  | -3.43359000 |
| C | 1.43752400  | 3.43436400  | -1.75808400 |
| C | 3.43177600  | -2.31510100 | 1.73116900  |
| C | 2.91888800  | 0.02706100  | 3.40580000  |
| C | 3.06108500  | -1.09896000 | -3.02079900 |
| C | 3.72154600  | -2.61536000 | -0.72216600 |
| C | 1.95899700  | 3.97026100  | 0.61501000  |
| C | 2.61917600  | 2.45296100  | 2.91336300  |
| C | 2.95628000  | 1.64761900  | -2.59176700 |
| C | 2.71263600  | 2.78478600  | -1.78110900 |
| C | 4.15460600  | -1.09136600 | 1.55901400  |
| C | 3.90168300  | 0.04353200  | 2.36963300  |
| C | 3.97305100  | -0.56940500 | -2.09551300 |
| C | 4.31869600  | -1.35889000 | -0.90342200 |
| C | 3.14769400  | 3.22518200  | 0.62181300  |
| C | 3.48947900  | 2.43477900  | 1.81381400  |
| C | 4.01335400  | 0.87638200  | -1.98642500 |
| C | 3.61109000  | 2.73234600  | -0.65857000 |
| C | 4.67373400  | -0.63147100 | 0.29796300  |
| C | 4.26459700  | 1.22351100  | 1.62501100  |
| C | 4.47495100  | 1.58416500  | -0.81685800 |
| C | 4.81295400  | 0.80590600  | 0.35795900  |
| C | 0.65992100  | -0.59451200 | 0.31005400  |
| C | 0.29332000  | 0.58827100  | 0.04133900  |

|    |             |             |             |
|----|-------------|-------------|-------------|
| Sc | -1.66703000 | -0.61606400 | 0.37136500  |
| Sc | 2.62022700  | 0.60948100  | -0.03327500 |

**The coordinates of optimized of Sc<sub>2</sub>C<sub>2</sub>@C<sub>80</sub>CPP[12]CPP**

|   |             |             |             |
|---|-------------|-------------|-------------|
| C | -0.50790300 | 7.72619400  | -2.04319900 |
| C | 0.87533900  | 7.65633500  | -2.10829400 |
| C | 1.63723500  | 7.43163900  | -0.96516000 |
| C | 0.96875800  | 7.34709400  | 0.25587000  |
| C | -0.41465400 | 7.39915300  | 0.31874400  |
| C | 3.05394000  | 7.02822100  | -1.03192300 |
| C | 4.02495300  | 7.54123800  | -0.17693300 |
| C | 5.26740900  | 6.93419400  | -0.05166700 |
| C | 5.56795300  | 5.75776700  | -0.73851200 |
| C | 4.61232200  | 5.28204200  | -1.64013300 |
| C | 3.39725100  | 5.92266100  | -1.80779000 |
| C | 6.69085700  | 4.87615900  | -0.36435200 |
| C | 6.87591100  | 4.53310200  | 0.97623600  |
| C | 7.64278300  | 3.43770200  | 1.33826300  |
| C | 8.19001200  | 2.59095800  | 0.37556600  |
| C | 8.10656300  | 3.00004600  | -0.95545000 |
| C | 7.39500500  | 4.13581900  | -1.31460600 |
| C | 8.44979500  | 1.17150100  | 0.69152400  |
| C | 7.43223800  | 0.48796800  | 1.35990500  |
| C | 7.40437100  | -0.88868500 | 1.42474500  |
| C | 8.38804100  | -1.66945900 | 0.81390800  |
| C | 9.44628400  | -0.99154900 | 0.21126300  |
| C | 9.47626300  | 0.40050000  | 0.15059400  |
| C | 8.05174200  | -3.09020900 | 0.58761500  |
| C | 7.44079700  | -3.84540400 | 1.58822000  |
| C | 6.59957200  | -4.90176300 | 1.27525700  |
| C | 6.39947900  | -5.29839100 | -0.04728400 |
| C | 7.16708700  | -4.66632800 | -1.02605100 |
| C | 7.95288900  | -3.56584200 | -0.72046000 |
| C | 5.21903600  | -6.10617300 | -0.40723000 |
| C | 4.81196100  | -7.23448100 | 0.30497500  |
| C | 3.54177700  | -7.77245700 | 0.13614000  |
| C | 2.65308900  | -7.24187500 | -0.79391400 |
| C | 3.10125600  | -6.18380200 | -1.58136100 |
| C | 4.33327900  | -5.59783500 | -1.36033200 |
| C | -3.02282100 | -7.03400100 | -0.95128200 |
| C | -3.99167300 | -7.56575000 | -0.10736100 |
| C | -5.24864100 | -6.98477900 | -0.00110200 |
| C | -5.56416800 | -5.81400100 | -0.69150900 |
| C | -4.60635300 | -5.31740100 | -1.58101400 |

|   |             |             |             |
|---|-------------|-------------|-------------|
| C | -3.37423600 | -5.93061500 | -1.72485600 |
| C | -6.70572200 | -4.95349700 | -0.32366800 |
| C | -6.90995100 | -4.62643700 | 1.01819300  |
| C | -7.68812100 | -3.54030800 | 1.38384300  |
| C | -8.22039800 | -2.68058900 | 0.42451800  |
| C | -8.12427100 | -3.07786500 | -0.90954400 |
| C | -7.40752900 | -4.20910100 | -1.27307400 |
| C | -8.45348000 | -1.25753600 | 0.74732800  |
| C | -7.42109100 | -0.60245000 | 1.42181700  |
| C | -7.34361900 | 0.77370400  | 1.47186500  |
| C | -8.30289300 | 1.58220100  | 0.85717000  |
| C | -9.38385800 | 0.93261400  | 0.26113700  |
| C | -9.45388300 | -0.45767600 | 0.20010700  |
| C | -7.94432200 | 2.99814700  | 0.63406600  |
| C | -7.30907100 | 3.74292200  | 1.62822300  |
| C | -6.49022000 | 4.81508100  | 1.30882200  |
| C | -6.34147100 | 5.24631400  | -0.01049100 |
| C | -7.13292900 | 4.62150600  | -0.97499500 |
| C | -7.88843500 | 3.49997200  | -0.66710900 |
| C | -5.18339100 | 6.08114200  | -0.38649700 |
| C | -4.76134600 | 7.18957800  | 0.34837700  |
| C | -3.49802500 | 7.73982500  | 0.16468700  |
| C | -3.08292200 | 6.18845100  | -1.59015700 |
| C | -4.32147400 | 5.61099300  | -1.38096200 |
| C | -2.62106200 | 7.23094000  | -0.78921500 |
| C | -1.18193700 | 7.55119200  | -0.83572900 |
| C | -0.91603000 | -7.31501900 | 0.30862400  |
| C | -1.60363400 | -7.42872600 | -0.89779600 |
| C | -0.86419300 | -7.66981000 | -2.05159700 |
| C | 0.51979300  | -7.73712500 | -2.01073700 |
| C | 1.21149500  | -7.55192800 | -0.81622300 |
| C | 0.46715700  | -7.37382600 | 0.34894000  |
| F | -1.19451400 | 7.90224200  | -3.16792000 |
| F | 1.47234400  | 7.75582300  | -3.29221500 |
| F | 1.64953500  | 7.09268000  | 1.37085800  |
| F | -1.00837700 | 7.17433200  | 1.48735000  |
| F | 3.75025300  | 8.60519500  | 0.57110800  |
| F | 6.15558900  | 7.46484300  | 0.78249300  |
| F | 4.79785700  | 4.12750200  | -2.27889700 |
| F | 2.50405400  | 5.38075600  | -2.63400700 |
| F | 6.21492900  | 5.17611500  | 1.93380700  |
| F | 7.72914800  | 3.12357700  | 2.62730600  |
| F | 8.60416000  | 2.22975700  | -1.91905200 |
| F | 7.30516400  | 4.44700200  | -2.60393800 |

|   |              |             |             |
|---|--------------|-------------|-------------|
| F | 6.37656500   | 1.14553000  | 1.84021700  |
| F | 6.32645300   | -1.45571500 | 1.96834400  |
| F | 10.42608200  | -1.67394800 | -0.37128600 |
| F | 10.48316800  | 0.98839800  | -0.48607800 |
| F | 7.54053100   | -3.47113000 | 2.86000300  |
| F | 5.88326500   | -5.44480000 | 2.25510100  |
| F | 7.06389900   | -5.03828300 | -2.29828000 |
| F | 8.50522600   | -2.88441200 | -1.72034400 |
| F | 5.62542100   | -7.78661500 | 1.19934900  |
| F | 3.16505900   | -8.78865700 | 0.90572400  |
| F | 2.29168000   | -5.63449900 | -2.48207200 |
| F | 4.60351100   | -4.46332600 | -2.00668000 |
| F | -3.70340400  | -8.62339500 | 0.64453900  |
| F | -6.13747800  | -7.53635400 | 0.81845000  |
| F | -4.81152200  | -4.17241800 | -2.23106400 |
| F | -2.47237000  | -5.37467700 | -2.53357800 |
| F | -6.24864800  | -5.26758000 | 1.97754600  |
| F | -7.79002300  | -3.24270200 | 2.67551000  |
| F | -8.61074600  | -2.29761800 | -1.87072800 |
| F | -7.30724100  | -4.50895400 | -2.56434000 |
| F | -6.39688700  | -1.29288600 | 1.92292700  |
| F | -6.24924900  | 1.30441300  | 2.01372000  |
| F | -10.35082000 | 1.64062200  | -0.31281100 |
| F | -10.47538700 | -1.01673600 | -0.44000600 |
| F | -7.37816000  | 3.35766500  | 2.89859900  |
| F | -5.75616100  | 5.35254000  | 2.27817400  |
| F | -7.09080900  | 5.02729500  | -2.24033800 |
| F | -8.46487400  | 2.83532800  | -1.66470400 |
| F | -5.55457000  | 7.71520700  | 1.27629500  |
| F | -3.11762200  | 8.74761200  | 0.94355200  |
| F | -2.28109600  | 5.64855100  | -2.50477000 |
| F | -4.62272500  | 4.52075300  | -2.08345000 |
| F | -1.58022800  | -7.02142800 | 1.42471400  |
| F | -1.48398400  | -7.78047300 | -3.22281400 |
| F | 1.19051800   | -7.91895000 | -3.14412100 |
| F | 1.08626400   | -7.13111300 | 1.50146600  |
| C | -1.94472300  | -0.37996900 | -3.52292800 |
| C | -0.62184100  | -0.59873200 | -3.88794000 |
| C | -2.62230600  | -1.31497000 | -2.68166900 |
| C | 0.07289300   | -1.76290200 | -3.43041600 |
| C | -1.96371300  | -2.46360500 | -2.21028200 |
| C | -0.57081000  | -2.70858800 | -2.60034600 |
| C | -2.36768200  | 0.94828600  | -3.14795000 |
| C | 0.31040500   | 0.50229500  | -3.92276600 |

|   |             |             |             |
|---|-------------|-------------|-------------|
| C | -3.50646000 | -0.55999700 | -1.80103600 |
| C | 1.45587600  | -1.39304800 | -3.22277700 |
| C | -2.41385600 | -2.96667600 | -0.93315300 |
| C | 0.27221900  | -3.46070500 | -1.72074300 |
| C | -3.29192700 | 0.84942400  | -2.05800100 |
| C | 1.57892600  | 0.03578200  | -3.45110100 |
| C | -1.47989500 | 2.00547300  | -3.19508300 |
| C | -0.10572800 | 1.77769000  | -3.58926100 |
| C | -3.90532000 | -1.03957500 | -0.53252600 |
| C | 2.23284900  | -2.04151500 | -2.26032200 |
| C | -3.43460500 | -2.35463600 | -0.11294600 |
| C | 1.63909700  | -3.11211500 | -1.54124300 |
| C | -1.51794300 | -3.67794200 | -0.08016200 |
| C | -0.19796800 | -3.97634100 | -0.47391800 |
| C | -3.27877800 | 1.79754900  | -1.00824500 |
| C | 2.38500200  | 0.84363400  | -2.62868700 |
| C | -1.49066800 | 2.99893000  | -2.15812500 |
| C | 0.74012400  | 2.63407700  | -2.80695600 |
| C | -3.10106500 | -2.63873100 | 1.29035300  |
| C | 2.01784100  | -3.38093400 | -0.17434400 |
| C | -1.86662500 | -3.41622000 | 1.27226100  |
| C | 0.83574700  | -3.90159300 | 0.49286800  |
| C | -4.05247700 | -0.04884000 | 0.50077200  |
| C | 3.22924500  | -1.27089100 | -1.55189100 |
| C | -2.32703400 | 2.90773600  | -1.03088800 |
| C | 1.96033200  | 2.18747200  | -2.26275900 |
| C | -0.13968100 | 3.48585500  | -2.04334100 |
| C | -3.73205900 | 1.33216300  | 0.25878100  |
| C | 3.24579500  | 0.14454700  | -1.71319300 |
| C | -3.22479300 | -1.61024400 | 2.31730300  |
| C | -0.81997700 | -3.33443200 | 2.26571200  |
| C | -3.73948300 | -0.33263100 | 1.88804700  |
| C | 0.55872100  | -3.57248100 | 1.84994800  |
| C | 3.04775800  | -2.65798500 | 0.50452400  |
| C | 3.75241900  | -1.60802100 | -0.24199400 |
| C | -3.27980600 | 1.91262900  | 1.47835700  |
| C | 3.74253000  | 0.72541100  | -0.50966000 |
| C | 0.28572100  | 4.04819200  | -0.88305100 |
| C | -1.86291800 | 3.51372700  | 0.22976000  |
| C | 2.42349900  | 2.78548800  | -0.99723500 |
| C | -3.26838000 | 0.89372800  | 2.47040400  |
| C | 4.09039900  | -0.33485400 | 0.40809900  |
| C | -1.07302900 | -2.46998500 | 3.35240600  |
| C | 1.60006500  | -2.89967600 | 2.55345100  |

|    |             |             |             |
|----|-------------|-------------|-------------|
| C  | -2.22389800 | -1.56943000 | 3.32328400  |
| C  | 2.80332700  | -2.42020600 | 1.89032600  |
| C  | -0.61256900 | 4.16444500  | 0.23875100  |
| C  | 1.61909500  | 3.77570500  | -0.39599300 |
| C  | -2.34808600 | 2.99343200  | 1.50768600  |
| C  | 3.32555100  | 2.05042800  | -0.11325300 |
| C  | -0.01912300 | -1.79550700 | 4.01825600  |
| C  | 1.30464600  | -2.00685600 | 3.61368000  |
| C  | -1.80357800 | -0.34343300 | 3.95855800  |
| C  | 3.17781500  | -1.17621100 | 2.54135500  |
| C  | -2.31509000 | 0.91012300  | 3.53162700  |
| C  | 3.79186600  | -0.10662100 | 1.81474500  |
| C  | 0.21610200  | 4.22072600  | 1.41722200  |
| C  | 1.58662800  | 3.98517400  | 1.02289300  |
| C  | -1.54667100 | 3.10388600  | 2.66497300  |
| C  | 3.32234100  | 2.30294200  | 1.27219400  |
| C  | -0.44851600 | -0.47496400 | 4.37543200  |
| C  | 2.23226800  | -0.91711600 | 3.58943700  |
| C  | -1.48236800 | 2.03557700  | 3.64139400  |
| C  | 3.44896300  | 1.20161000  | 2.22320500  |
| C  | -0.24795600 | 3.70207600  | 2.61109200  |
| C  | 2.43309100  | 3.26048200  | 1.84864300  |
| C  | 0.44642500  | 0.63829900  | 4.35361300  |
| C  | 1.83876300  | 0.40600500  | 3.94747000  |
| C  | -0.12623200 | 1.90729600  | 4.10090400  |
| C  | 2.55628300  | 1.45416500  | 3.32229600  |
| C  | 0.63438000  | 2.95359000  | 3.47786300  |
| C  | 1.94921300  | 2.73711500  | 3.10198100  |
| C  | 0.00915500  | 0.57445700  | 0.82100300  |
| C  | -0.15789200 | 0.24890500  | -0.39011700 |
| Sc | 1.87032900  | -0.61834300 | 0.43391200  |
| Sc | -1.79132300 | -0.96598100 | 0.57777900  |

**The coordinates of optimized of Sc<sub>2</sub>C<sub>2</sub>@C<sub>82</sub>-PF[12]CPP**

|   |             |             |             |
|---|-------------|-------------|-------------|
| C | 1.98574700  | -7.32739700 | -2.15340500 |
| C | 0.61359600  | -7.52185400 | -2.10507500 |
| C | -0.08465500 | -7.42747600 | -0.90390900 |
| C | 0.64900700  | -7.19827300 | 0.25984200  |
| C | 2.01957000  | -7.00048300 | 0.21097600  |
| C | -1.55281400 | -7.30119600 | -0.87005100 |
| C | -2.35671200 | -7.94993400 | 0.06393200  |
| C | -3.68784300 | -7.59329800 | 0.24090000  |
| C | -4.26066900 | -6.55252100 | -0.49012800 |
| C | -3.46816700 | -5.95038300 | -1.46878800 |

|   |             |             |             |
|---|-------------|-------------|-------------|
| C | -2.15129100 | -6.32503200 | -1.66286800 |
| C | -5.52826500 | -5.89815200 | -0.11212100 |
| C | -5.73326800 | -5.50156400 | 1.21027300  |
| C | -6.71528500 | -4.58145200 | 1.54169500  |
| C | -7.47933800 | -3.95428000 | 0.55727800  |
| C | -7.34607000 | -4.42683400 | -0.74871000 |
| C | -6.41237500 | -5.40140000 | -1.07005000 |
| C | -8.08611500 | -2.63014900 | 0.80299600  |
| C | -7.27951800 | -1.66988600 | 1.41506800  |
| C | -7.61156100 | -0.33286600 | 1.41247300  |
| C | -8.76332400 | 0.13618500  | 0.77669100  |
| C | -9.60919900 | -0.82353800 | 0.22481400  |
| C | -9.28132700 | -2.17850900 | 0.24428900  |
| C | -8.78263400 | 1.58153200  | 0.46651200  |
| C | -8.37268800 | 2.50915400  | 1.42289000  |
| C | -7.74732000 | 3.68948300  | 1.05296600  |
| C | -7.57599800 | 4.02552900  | -0.29091100 |
| C | -8.18657300 | 3.19921500  | -1.23585700 |
| C | -8.75319900 | 1.98795200  | -0.86802500 |
| C | -6.51117300 | 4.97439900  | -0.67289100 |
| C | -6.29183700 | 6.18678400  | -0.01938200 |
| C | -5.08944300 | 6.86868800  | -0.15724500 |
| C | -4.08250200 | 6.39654400  | -0.99340600 |
| C | -4.33818200 | 5.23699200  | -1.71968700 |
| C | -5.51074900 | 4.52613200  | -1.54055900 |
| C | 1.52837100  | 7.43217400  | -0.97159600 |
| C | 2.32242200  | 8.02781500  | 0.00725800  |
| C | 3.63924100  | 7.63494800  | 0.20565300  |
| C | 4.20509000  | 6.59302600  | -0.53230300 |
| C | 3.43376400  | 6.06071600  | -1.56741700 |
| C | 2.14352900  | 6.50264100  | -1.80894300 |
| C | 5.43933000  | 5.89599600  | -0.12055800 |
| C | 5.61958800  | 5.51102600  | 1.21004600  |
| C | 6.60608800  | 4.60789600  | 1.57737100  |
| C | 7.38462100  | 3.95613000  | 0.61901200  |
| C | 7.26063800  | 4.40241900  | -0.69884800 |
| C | 6.34145700  | 5.38006100  | -1.05146300 |
| C | 8.00657800  | 2.64164400  | 0.88868700  |
| C | 7.23193100  | 1.68372900  | 1.54640300  |
| C | 7.53621600  | 0.33916800  | 1.49119400  |
| C | 8.65061100  | -0.13648700 | 0.79682500  |
| C | 9.49258400  | 0.82489000  | 0.23924500  |
| C | 9.17931100  | 2.18190100  | 0.28618200  |
| C | 8.65155900  | -1.57491800 | 0.45682700  |

|   |              |             |             |
|---|--------------|-------------|-------------|
| C | 8.24557400   | -2.52285100 | 1.39570500  |
| C | 7.63824400   | -3.70507000 | 1.00374200  |
| C | 7.50302200   | -4.04129500 | -0.34541700 |
| C | 8.11457500   | -3.19246000 | -1.27023900 |
| C | 8.64156200   | -1.96865300 | -0.88226000 |
| C | 6.48488300   | -5.03299200 | -0.74808600 |
| C | 6.28069900   | -6.23222200 | -0.06320200 |
| C | 5.09227200   | -6.93932800 | -0.19004700 |
| C | 4.34643100   | -5.39212000 | -1.83846200 |
| C | 5.50089700   | -4.64818800 | -1.66495300 |
| C | 4.08776000   | -6.51343600 | -1.05365900 |
| C | 2.70903400   | -7.03327200 | -1.00136700 |
| C | -0.63323200  | 7.23513700  | 0.20871800  |
| C | 0.05442400   | 7.51381600  | -0.97517800 |
| C | -0.68909600  | 7.57527300  | -2.15291000 |
| C | -2.04391200  | 7.27575700  | -2.16004100 |
| C | -2.71542500  | 6.94898000  | -0.98665300 |
| C | -1.99229300  | 6.96628300  | 0.20405800  |
| F | 2.60337500   | -7.37875900 | -3.32983600 |
| F | -0.04381900  | -7.75300100 | -3.23792200 |
| F | 0.02175500   | -7.05973500 | 1.42435300  |
| F | 2.66091200   | -6.67857600 | 1.33152900  |
| F | -1.84032900  | -8.90367300 | 0.83209700  |
| F | -4.40418100  | -8.23517500 | 1.15810900  |
| F | -3.92264300  | -4.90274200 | -2.15629700 |
| F | -1.42180500  | -5.63326700 | -2.53694500 |
| F | -4.90855300  | -5.91134000 | 2.16948000  |
| F | -6.83172100  | -4.21196400 | 2.81350800  |
| F | -8.03607300  | -3.86121700 | -1.73515600 |
| F | -6.30376800  | -5.78061100 | -2.33962000 |
| F | -6.08234400  | -1.99338300 | 1.90496000  |
| F | -6.71201000  | 0.51543300  | 1.91063000  |
| F | -10.72816600 | -0.44913400 | -0.38567200 |
| F | -10.11056000 | -3.03969400 | -0.33528500 |
| F | -8.41967900  | 2.19590600  | 2.71414800  |
| F | -7.18046500  | 4.42057800  | 2.00734700  |
| F | -8.11604300  | 3.49913700  | -2.52921600 |
| F | -9.12970100  | 1.14546500  | -1.82654000 |
| F | -7.22040800  | 6.68608600  | 0.78995800  |
| F | -4.89099000  | 7.97509400  | 0.55281700  |
| F | -3.40460400  | 4.72865700  | -2.52217200 |
| F | -5.61169600  | 3.33952400  | -2.13916000 |
| F | 1.80824000   | 8.96202200  | 0.80109900  |
| F | 4.34528800   | 8.23938500  | 1.15614800  |

|   |             |             |             |
|---|-------------|-------------|-------------|
| F | 3.86874000  | 5.01676100  | -2.27067600 |
| F | 1.44663700  | 5.90986000  | -2.77460400 |
| F | 4.78245100  | 5.93291900  | 2.15332900  |
| F | 6.72296500  | 4.29561100  | 2.86436500  |
| F | 7.95626700  | 3.81948800  | -1.67138500 |
| F | 6.27750800  | 5.75235300  | -2.32591900 |
| F | 6.08390500  | 2.01752600  | 2.13332200  |
| F | 6.64201500  | -0.50434500 | 2.00683400  |
| F | 10.59336600 | 0.45139100  | -0.40410600 |
| F | 10.00228300 | 3.03832800  | -0.30920500 |
| F | 8.29517600  | -2.24049200 | 2.69401200  |
| F | 7.06689100  | -4.44761500 | 1.94716600  |
| F | 8.09820000  | -3.48978400 | -2.56570800 |
| F | 9.01753200  | -1.11418000 | -1.82996800 |
| F | 7.20675200  | -6.69147400 | 0.77236100  |
| F | 4.90229000  | -8.01861100 | 0.56286700  |
| F | 3.42081600  | -4.94611300 | -2.68531800 |
| F | 5.59479400  | -3.49083800 | -2.31601500 |
| F | 0.03103100  | 7.11559500  | 1.35497000  |
| F | -0.09576100 | 7.87732300  | -3.30366600 |
| F | -2.69897800 | 7.26997100  | -3.31787300 |
| F | -2.58605300 | 6.63045900  | 1.34609300  |
| C | 3.28445200  | -2.41518900 | 1.29409300  |
| C | 3.24512300  | -1.60888900 | 2.45784800  |
| C | 3.71448200  | -1.88001400 | 0.01887400  |
| C | 2.28359700  | -3.41502300 | 1.03632100  |
| C | 2.20220400  | -1.86928000 | 3.39693700  |
| C | 3.72008100  | -0.24333400 | 2.36728900  |
| C | 1.59912500  | -0.80082800 | 4.17267500  |
| C | 1.20503200  | -2.85905100 | 3.14160400  |
| C | 3.96109600  | 0.27899500  | 1.04796800  |
| C | 3.16984900  | 0.83720100  | 3.19273900  |
| C | 3.96802300  | -0.50646300 | -0.15555600 |
| C | 3.58002700  | 1.64872700  | 1.02694600  |
| C | 3.63443500  | 0.14972500  | -1.41608800 |
| C | 3.03395900  | -2.62353800 | -0.99170400 |
| C | 2.04033500  | 0.56331000  | 4.08325700  |
| C | 3.07461900  | 2.00008200  | 2.31896700  |
| C | 0.98954000  | 1.53467300  | 4.13048800  |
| C | 0.21797600  | -1.15805400 | 4.36735400  |
| C | 0.99909900  | 2.76011500  | 3.35502900  |
| C | -0.39247000 | 1.18862300  | 4.34368300  |
| C | 2.02716800  | 2.99130900  | 2.40299900  |
| C | 1.70066700  | 3.70921200  | 1.23431400  |

|   |             |             |             |
|---|-------------|-------------|-------------|
| C | 2.33804300  | 3.40530900  | -0.02632400 |
| C | 0.34314100  | 4.09650500  | 0.96325700  |
| C | -0.34385300 | 3.14251500  | 3.09417000  |
| C | 3.14337300  | -0.67585100 | -2.45272000 |
| C | 2.75650900  | -2.03996200 | -2.20281500 |
| C | 2.25151800  | -0.17679500 | -3.46181400 |
| C | 3.26552500  | 1.57046400  | -1.43072700 |
| C | 3.22490200  | 2.32471000  | -0.18376600 |
| C | 2.44334500  | 2.03617200  | -2.47968500 |
| C | 1.38951400  | 3.70399000  | -1.04918200 |
| C | -0.80095400 | -0.16788700 | 4.43055400  |
| C | -1.20748200 | 2.17811100  | 3.71174100  |
| C | -2.08518500 | -0.50672300 | 3.92201000  |
| C | -0.01467100 | -2.42785200 | 3.75033100  |
| C | -2.89043200 | 0.47667000  | 3.26742800  |
| C | -2.31018500 | -1.77031500 | 3.29049100  |
| C | -2.44366200 | 1.82200400  | 3.10954900  |
| C | -2.83301200 | 2.50125700  | 1.92015500  |
| C | -1.96629400 | 3.45484600  | 1.29312100  |
| C | -3.56859800 | 1.82925600  | 0.89349800  |
| C | -3.64440100 | -0.17898600 | 2.24321500  |
| C | -0.69908500 | 3.77162500  | 1.86073200  |
| C | 0.13485400  | 4.05579100  | -0.46159500 |
| C | -2.14788400 | 3.37115900  | -0.12330100 |
| C | -1.26875000 | -2.73201000 | 3.15310100  |
| C | -3.27969600 | -1.58001000 | 2.25542500  |
| C | -1.27277500 | -3.53757500 | 1.98001800  |
| C | -2.23678600 | -3.32544700 | 0.94417900  |
| C | -0.05089700 | -3.96496100 | 1.36590900  |
| C | -3.29433100 | -2.37169700 | 1.06354100  |
| C | -3.79975100 | -1.75709700 | -0.14398100 |
| C | -4.17175500 | -0.32124900 | -0.15740400 |
| C | -3.07558700 | -2.02193300 | -1.37405000 |
| C | -1.58042300 | -3.60104000 | -0.31746600 |
| C | -4.02894800 | 0.48404700  | 1.03490300  |
| C | -3.12542600 | 2.36840000  | -0.37833300 |
| C | -3.66248500 | 0.24055200  | -1.39731800 |
| C | 1.20722200  | -3.61407300 | 1.93012300  |
| C | -0.24210600 | -4.00566400 | -0.05182900 |
| C | 2.09220900  | -3.51508200 | -0.38673600 |
| C | 0.80983200  | -3.70122200 | -0.96162100 |
| C | 0.47867800  | -3.03881000 | -2.22406500 |
| C | 1.51301800  | -2.32221000 | -2.87210500 |
| C | -1.13262600 | -1.55287400 | -3.38251800 |

|    |             |             |             |
|----|-------------|-------------|-------------|
| C  | -0.90214000 | -2.62901100 | -2.48912900 |
| C  | -0.05398600 | -0.81728800 | -3.97437700 |
| C  | -2.19420400 | -0.60853900 | -3.17006800 |
| C  | -1.92703200 | -2.88631200 | -1.48222000 |
| C  | 1.24107900  | -1.19221400 | -3.71314500 |
| C  | -3.11627700 | -0.83375400 | -2.16592900 |
| C  | -0.41799500 | 0.59113300  | -3.98896500 |
| C  | 0.53416400  | 1.54779000  | -3.73991700 |
| C  | -1.72105100 | 0.72731700  | -3.40574300 |
| C  | 0.22058800  | 2.68033900  | -2.91841300 |
| C  | 1.90851900  | 1.15045400  | -3.47440500 |
| C  | -2.04835400 | 1.79819900  | -2.53523600 |
| C  | -3.08080100 | 1.55462600  | -1.52978000 |
| C  | -1.03360300 | 2.82165500  | -2.27819900 |
| C  | 1.44119300  | 3.04296200  | -2.24818000 |
| C  | -1.07227500 | 3.58726400  | -1.03147000 |
| C  | -0.04036100 | 0.67644200  | 0.24055300  |
| C  | 0.32557500  | -0.51912500 | 0.04471300  |
| Sc | 1.53641500  | 0.20935600  | 1.85345400  |
| Sc | -1.98628200 | -0.51772000 | 0.25285000  |

**The coordinates of optimized of Sc<sub>2</sub>C<sub>2</sub>@C<sub>84</sub>CPP[12]CPP**

|   |             |             |             |
|---|-------------|-------------|-------------|
| C | 9.32187800  | -0.43764100 | -0.51807200 |
| C | 9.14870900  | -1.81661200 | -0.55562200 |
| C | 7.98378700  | -2.38568700 | -1.06737500 |
| C | 7.04052300  | -1.51936300 | -1.62656600 |
| C | 7.22195100  | -0.14909100 | -1.60465500 |
| C | 7.57693900  | -3.77930100 | -0.79669300 |
| C | 7.58413400  | -4.24836800 | 0.51800800  |
| C | 6.84334000  | -5.35976600 | 0.88911600  |
| C | 6.03019200  | -6.02133100 | -0.02854700 |
| C | 6.12033800  | -5.62862600 | -1.36473400 |
| C | 6.89211800  | -4.54020200 | -1.74335600 |
| C | 4.85534900  | -6.79942600 | 0.41334500  |
| C | 3.99678900  | -6.19143600 | 1.32817800  |
| C | 2.70364100  | -6.64073500 | 1.51936100  |
| C | 2.18538800  | -7.71744600 | 0.79594300  |
| C | 3.09325500  | -8.41480900 | -0.00869900 |
| C | 4.38932100  | -7.95315600 | -0.21241500 |
| C | 0.71873300  | -7.87591200 | 0.68916000  |
| C | -0.14950200 | -7.64710400 | 1.76044600  |
| C | -1.49618200 | -7.37761600 | 1.55480900  |
| C | -2.08011100 | -7.47206100 | 0.28893100  |
| C | -1.24106100 | -7.86337500 | -0.75495400 |

|   |             |             |             |
|---|-------------|-------------|-------------|
| C | 0.12732100  | -7.99233200 | -0.57293900 |
| C | -3.44794800 | -6.97625400 | 0.04052700  |
| C | -4.50426600 | -7.17178500 | 0.93506300  |
| C | -5.67324400 | -6.42579600 | 0.84696400  |
| C | -5.87056900 | -5.51115400 | -0.18308200 |
| C | -4.87824000 | -5.42307400 | -1.15598000 |
| C | -3.68186500 | -6.10520700 | -1.02591500 |
| C | -6.86143600 | -4.41796200 | -0.13324800 |
| C | -6.81311400 | -3.54964200 | 0.95557500  |
| C | -7.35289600 | -2.27718300 | 0.88139100  |
| C | -7.99524400 | -1.82759200 | -0.27409000 |
| C | -8.15053300 | -2.74219900 | -1.31546500 |
| C | -7.58077200 | -4.00657200 | -1.25187500 |
| C | -7.08165500 | 3.74318500  | -0.32214300 |
| C | -6.32360000 | 4.00088300  | 0.82210000  |
| C | -5.44708000 | 5.07106800  | 0.87432500  |
| C | -5.28001200 | 5.91952800  | -0.21904900 |
| C | -6.08474700 | 5.70566500  | -1.33382500 |
| C | -6.98042200 | 4.64645100  | -1.37898600 |
| C | -4.09949700 | 6.80253300  | -0.24889700 |
| C | -3.77757300 | 7.67268000  | 0.78839600  |
| C | -2.51164400 | 8.23279000  | 0.89047400  |
| C | -1.49567800 | 7.89204900  | -0.00586100 |
| C | -1.84858000 | 7.08076100  | -1.08698200 |
| C | -3.12835100 | 6.57166800  | -1.21867100 |
| C | -0.06609000 | 8.11638500  | 0.28252400  |
| C | 0.44489800  | 7.80952500  | 1.54583500  |
| C | 1.80782500  | 7.69075400  | 1.76631800  |
| C | 2.71786900  | 7.74403900  | 0.70972600  |
| C | 2.21636300  | 8.13153000  | -0.53446200 |
| C | 0.86278600  | 8.36408800  | -0.72914700 |
| C | 4.04236100  | 7.09852500  | 0.80804300  |
| C | 4.10591500  | 5.82996400  | 1.39122100  |
| C | 5.21472100  | 5.02029900  | 1.24727700  |
| C | 6.31664600  | 5.42545000  | 0.49437500  |
| C | 6.28890300  | 6.71284900  | -0.03233200 |
| C | 5.18325000  | 7.54114200  | 0.13752400  |
| C | 7.27949400  | 4.37929700  | 0.09692000  |
| C | 7.79943400  | 3.49064900  | 1.03425100  |
| C | 8.29201900  | 2.25399200  | 0.64868500  |
| C | 7.89137800  | 2.80569000  | -1.63743400 |
| C | 7.39411900  | 4.04112500  | -1.25100300 |
| C | 8.28807900  | 1.86449500  | -0.69055300 |
| C | 8.34722100  | 0.42448600  | -1.01092400 |

|   |             |             |             |
|---|-------------|-------------|-------------|
| C | -7.35632900 | 1.61790300  | -1.55402100 |
| C | -7.71207000 | 2.41793100  | -0.46961200 |
| C | -8.42793400 | 1.81184200  | 0.56293600  |
| C | -8.66194600 | 0.44489700  | 0.56886400  |
| C | -8.18569400 | -0.37546100 | -0.45427800 |
| C | -7.58596300 | 0.25168400  | -1.54613900 |
| F | 10.41605200 | 0.05718700  | 0.05145600  |
| F | 10.09482100 | -2.59284400 | -0.03737600 |
| F | 5.88035100  | -1.98697300 | -2.08705000 |
| F | 6.23329700  | 0.62449900  | -2.05191300 |
| F | 8.20341300  | -3.55771900 | 1.47118400  |
| F | 6.82323700  | -5.71156700 | 2.17095000  |
| F | 5.36067900  | -6.21972300 | -2.28260600 |
| F | 6.88155300  | -4.16395800 | -3.01846600 |
| F | 4.35300400  | -5.06754700 | 1.94746200  |
| F | 1.93205400  | -5.91976900 | 2.32688100  |
| F | 2.71607900  | -9.51920300 | -0.64428800 |
| F | 5.17249300  | -8.60669900 | -1.06460900 |
| F | 0.30376400  | -7.61909800 | 3.00898200  |
| F | -2.21036400 | -6.96990400 | 2.59969200  |
| F | -1.72767500 | -8.05817900 | -1.97651100 |
| F | 0.87411900  | -8.16903500 | -1.65889000 |
| F | -4.38897800 | -8.04813800 | 1.92719800  |
| F | -6.59378200 | -6.55883800 | 1.79671900  |
| F | -4.99741500 | -4.54146100 | -2.14708600 |
| F | -2.70603900 | -5.78667000 | -1.87464200 |
| F | -6.08943500 | -3.86961200 | 2.02662700  |
| F | -7.10234800 | -1.43618800 | 1.88446000  |
| F | -8.78848100 | -2.38401700 | -2.42494100 |
| F | -7.66002600 | -4.80097100 | -2.31470500 |
| F | -6.33152800 | 3.14444400  | 1.84164300  |
| F | -4.67265600 | 5.20985300  | 1.94842300  |
| F | -5.96251200 | 6.49323400  | -2.39784800 |
| F | -7.70645600 | 4.46851800  | -2.47810500 |
| F | -4.67765000 | 7.93746500  | 1.73057100  |
| F | -2.26478500 | 9.06327800  | 1.89828900  |
| F | -0.93167800 | 6.66321700  | -1.95574300 |
| F | -3.37394700 | 5.73364600  | -2.22283300 |
| F | -0.37116500 | 7.52482000  | 2.55614800  |
| F | 2.22209500  | 7.41683500  | 2.99924600  |
| F | 3.01914400  | 8.19199300  | -1.59298000 |
| F | 0.45710500  | 8.74083600  | -1.93744400 |
| F | 3.04633400  | 5.31301000  | 2.01083600  |
| F | 5.15459600  | 3.78352800  | 1.74409900  |

|   |             |             |             |
|---|-------------|-------------|-------------|
| F | 7.31545400  | 7.15368000  | -0.75220500 |
| F | 5.21583900  | 8.75701700  | -0.39676100 |
| F | 7.71370900  | 3.77093100  | 2.33131500  |
| F | 8.64404000  | 1.38456400  | 1.59176000  |
| F | 7.87658600  | 2.48244300  | -2.92710800 |
| F | 6.89900300  | 4.85340200  | -2.18069300 |
| F | -6.63461200 | 2.12040400  | -2.55321500 |
| F | -8.84280500 | 2.53655800  | 1.59712400  |
| F | -9.29091400 | -0.09126600 | 1.61017400  |
| F | -7.05796100 | -0.46961900 | -2.53286700 |
| C | 3.94913200  | 0.66834000  | 0.38006400  |
| C | 3.65455700  | 0.36378300  | 1.76751500  |
| C | 3.76797500  | -0.38009600 | -0.59583900 |
| C | 3.37875600  | 1.86801000  | -0.19202600 |
| C | 3.20581000  | -0.96978300 | 2.09719900  |
| C | 2.81126200  | 1.27547300  | 2.50237800  |
| C | 3.42874400  | -1.74911500 | -0.26273400 |
| C | 3.13378100  | -2.05625800 | 1.14338200  |
| C | 2.62055300  | 2.84127900  | 0.56654100  |
| C | 2.32542200  | 2.53137600  | 1.97256900  |
| C | 3.20557700  | 0.20227500  | -1.78641000 |
| C | 2.96927600  | 1.57769400  | -1.54090400 |
| C | 2.18847400  | -0.87114900 | 3.10933600  |
| C | 1.94476300  | 0.50289800  | 3.35482900  |
| C | 2.80705000  | -2.50146600 | -1.26938900 |
| C | 2.23253500  | -3.08788500 | 1.44095100  |
| C | 1.72517700  | 3.64308600  | -0.15575400 |
| C | 1.15832900  | 3.04614000  | 2.55311900  |
| C | 2.45570900  | -0.53142000 | -2.75567500 |
| C | 1.95967300  | 2.30757700  | -2.24349200 |
| C | 1.18751800  | -1.86610200 | 3.33602300  |
| C | 0.68811000  | 0.97009900  | 3.84580100  |
| C | 2.35732800  | -1.91363000 | -2.52417300 |
| C | 1.29626500  | -3.02418500 | 2.55133000  |
| C | 1.42052100  | 3.40953700  | -1.55996500 |
| C | 0.36260000  | 2.29536700  | 3.51181700  |
| C | 1.87475400  | -3.54019800 | -0.92977800 |
| C | 1.59669800  | -3.82768100 | 0.38708500  |
| C | 0.52540800  | 4.14045800  | 0.46397600  |
| C | 0.25034800  | 3.84958200  | 1.78184300  |
| C | 1.42549000  | 0.17941200  | -3.50749100 |
| C | 1.17662400  | 1.60097600  | -3.25110100 |
| C | -0.10710500 | -1.43555200 | 3.85333400  |
| C | -0.35702700 | -0.01426400 | 4.10759000  |

|   |             |             |             |
|---|-------------|-------------|-------------|
| C | 1.18758900  | -2.62696000 | -2.92778800 |
| C | 0.12581800  | -3.74205900 | 2.15679400  |
| C | 0.05887900  | 3.78963300  | -1.76264800 |
| C | -0.99985400 | 2.67689800  | 3.31883700  |
| C | 0.81602600  | -3.56336100 | -1.89820100 |
| C | 0.25527700  | -4.15469100 | 0.78207800  |
| C | -0.53795500 | 4.13826100  | -0.49906400 |
| C | -1.09653000 | 3.55398900  | 2.18011000  |
| C | 0.37104300  | -0.59899300 | -4.02626700 |
| C | -0.10598500 | 2.11462600  | -3.53323100 |
| C | -1.21092200 | -2.26652600 | 3.57301300  |
| C | -1.68733900 | 0.44984100  | 4.06252100  |
| C | 0.22059400  | -1.98599400 | -3.67089400 |
| C | -0.68710600 | 3.16297700  | -2.73507300 |
| C | -1.10081400 | -3.38116300 | 2.66667100  |
| C | -2.00388200 | 1.77530400  | 3.59572200  |
| C | -0.52958100 | -3.73962600 | -1.51903300 |
| C | -0.82486300 | -4.05541700 | -0.11699400 |
| C | -1.84631400 | 3.72355800  | -0.16534800 |
| C | -2.13690700 | 3.41517900  | 1.23778600  |
| C | -0.95511800 | -0.07145400 | -4.17185900 |
| C | -1.18876700 | 1.26200800  | -3.92866600 |
| C | -2.52952100 | -1.73091800 | 3.39856200  |
| C | -2.76513400 | -0.39653600 | 3.64097800  |
| C | -1.15849000 | -2.26632600 | -3.42716800 |
| C | -2.06527100 | 2.87217800  | -2.49467700 |
| C | -2.25655800 | -3.42923900 | 1.82728700  |
| C | -3.15811800 | 1.72193000  | 2.75637600  |
| C | -1.53262300 | -3.07561600 | -2.34413300 |
| C | -2.12055900 | -3.70062400 | 0.45705000  |
| C | -2.62645600 | 3.09175600  | -1.22679200 |
| C | -3.20808600 | 2.47937400  | 1.57439800  |
| C | -1.90914300 | -1.06406900 | -3.76301300 |
| C | -2.39051400 | 1.68009000  | -3.26153400 |
| C | -3.16945700 | -2.39390900 | 2.29757300  |
| C | -3.65359900 | 0.35294800  | 2.79767300  |
| C | -2.78826500 | -2.75450200 | -1.74522800 |
| C | -3.07509500 | -3.05822100 | -0.39214500 |
| C | -3.67737100 | 2.19769700  | -0.85312100 |
| C | -3.95527500 | 1.89745500  | 0.50453900  |
| C | -3.08120100 | -0.69064600 | -3.09212300 |
| C | -3.33162800 | 0.73402300  | -2.83308600 |
| C | -4.02639600 | -1.68619000 | 1.44421700  |
| C | -4.27504700 | -0.25984400 | 1.70164800  |

|    |             |             |             |
|----|-------------|-------------|-------------|
| C  | -3.61715800 | -1.65035400 | -2.14732000 |
| C  | -4.08479800 | -2.14236300 | 0.06875700  |
| C  | -4.09112300 | 1.07405700  | -1.65033800 |
| C  | -4.56184400 | 0.59161700  | 0.56584500  |
| C  | -4.48056600 | -1.30647600 | -1.04272900 |
| C  | -4.71307300 | 0.10213000  | -0.78268700 |
| C  | -0.39095600 | 0.46353900  | -0.29040700 |
| C  | -0.40534000 | -0.56340000 | 0.45186600  |
| Sc | 1.76350700  | 0.25059300  | 0.58517000  |
| Sc | -2.55729700 | -0.35666200 | -0.41923500 |
